# Supplementary material for: Encumbrance in desilylation triggered fluorogenic detection of the fluoride ion – a kinetic approach
Source: Royal Society of Chemistry journal article supplement (doi:10.1039/c6cp06557k), 2016-01-01
Supplement: c6cp06557k1.pdf [file c6cp06557k1.pdf]

Electronic Supplementary Information (ESI)

**Encumbrance in desilylation triggered fluorogenic detection of  
fluoride ion – A kinetic approach**

*Raghupathy Suresh, Senthil Kumar Thiyagarajan, Perumal Ramamurthy\**

National Centre for Ultrafast Processes, University of Madras, Taramani Campus,

Chennai - 600 113, India.

Email: [prm60@hotmail.com](mailto:prm60@hotmail.com)

**Contents**

**Methods and materials**

**Figure S-1:** IR Spectrum of ADDSi1.

**Figure S-2:**  $^1\text{H}$  NMR Spectrum of ADDSi1 in DMSO- $d_6$ .

**Figure S-3:**  $^{13}\text{C}$  NMR Spectrum of ADDSi1 in DMSO- $d_6$ .

**Figure S-4:** HRMS of ADDSi1.

**Figure S-5:** IR Spectrum of ADDSi2.

**Figure S-6:**  $^1\text{H}$  NMR Spectrum of ADDSi2 in DMSO- $d_6$ .

**Figure S-7:**  $^{13}\text{C}$  NMR Spectrum of ADDSi2 in DMSO- $d_6$ .

**Figure S-8:** HRMS of ADDSi2.

**Figure S-9.** a) Absorption Spectrum ADDSi1 in various solvents. b) Emission Spectrum of ADDSi1 in various solvents.

**Figure S-10.** a) Absorption Spectrum ADDSi2 in various solvents. b) Emission Spectrum of ADDSi2 in various solvents.

**Figure S-11.** Selectivity of studies a) ADDSi1 in ACN b) ADDSi2 in ACN c) ADDSi1 in ACN/Water (1:1) d) ADDSi2 in ACN/Water (1:1).

**Figure S-12.** a) Variation in Absorption Spectra of ADDSi1 in ACN upon addition of fluoride anion (TBAF). b) Variation in Absorption Spectra of ADDSi2 in ACN upon addition of fluoride anion (TBAF).

**Figure S-13.** a) Variation in fluorescence lifetime decay of ADDSi1 in ACN : H<sub>2</sub>O (1:1) upon addition of fluoride anion (TBAF). b) Variation in fluorescence lifetime decay of ADDSi2 in ACN : H<sub>2</sub>O (1:1) upon addition of fluoride anion (TBAF).

**Figure S-14.** Partial <sup>1</sup>H NMR Spectrum of ADDSi 1 & ADDSi 2 in DMSO-d<sub>6</sub> upon addition of fluoride ion (0 – 2 eq).

**Figure S-15.** a) Plot of change in emission intensity (F<sup>o</sup> - F) of ADDSi1 in ACN at 435 nm against concentration of fluoride ion. b) Plot of change in emission intensity (F<sup>o</sup> - F) of ADDSi2 in ACN at 435 nm against concentration of fluoride ion.

**Figure S-16.** a) Variation in Absorption Spectra of ADDSi1 in ACN/Water (1:1) upon addition of fluoride anion (TBAF). b) Variation in Absorption Spectra of ADDSi2 in ACN/Water (1:1) upon addition of fluoride anion (TBAF).

**Figure S-17.** a) Variation in fluorescence lifetime decay of ADDSi1 in ACN : H<sub>2</sub>O (1:1) upon addition of different concentrations of fluoride anion (TBAF). b) Plot of relative amplitudes of two lifetime vs fluoride ion concentration.

**Figure S-18.** a) Time course of desilylation reaction of ADDSi1 (14 μM) upon addition of different concentrations of TBAF (140 - 420 μM) in ACN by following emission change at 435 nm. b) Guggenheim plot for pseudo first order kinetics of desilylation reaction of ADDSi1 in ACN on addition of different concentrations of TBAF. c) Plot of fluoride concentration vs k<sub>obs</sub> (ADDSi1 in ACN). d) Plot of ln ([F<sup>-</sup>]) vs ln (k<sub>obs</sub>) (ADDSi1 in ACN).

**Figure S-19.** a) Time course of desilylation reaction of ADDSi1 (14 μM) upon addition of different concentrations of TBAF (140 - 420 μM) in ACN/Water (1:1) by following emission change at 435 nm. b) Guggenheim plot for pseudo first order kinetics of desilylation reaction of ADDSi1 in ACN/Water (1:1) on addition of different concentrations of TBAF. c) Plot of fluoride concentration vs k<sub>obs</sub> (ADDSi1 in ACN/Water (1:1)).

**Figure S-20.** a) Variation in Emission Spectra of ADDSi2 in ACN/Water (1:1) upon addition of different concentrations of fluoride anion (NaF). b) Plot of change in emission intensity (F<sup>o</sup> - F) of ADDSi2 in ACN/Water (1:1) at 447 nm against concentration of fluoride ion (NaF).

**Figure S-21.** a) Time course of desilylation reaction of ADDSi2 (14 μM) upon addition of different concentrations of NaF (1.12 mM – 1.96 mM) in ACN/Water (1:1) by following emission change at 447 nm. b) Guggenheim plot for pseudo first order kinetics of desilylation reaction of ADDSi2 in ACN/Water (1:1) on addition of different concentrations of NaF. c) Plot of fluoride concentration vs k<sub>obs</sub> (ADDSi2 in ACN/Water (1:1)).

**Figure S-22.** Variation in fluorescence intensity of ADDSi2 (14 μM) before (I<sub>o</sub>) and after (I<sub>F</sub><sup>-</sup>) addition of fluoride ion (TBAF, 52.6 μM) in various pH buffer solutions - ACN/Water (1:1, 10mM buffer solutions pH 3 - 12)

**Figure S-23.** a) Plot of change in emission intensity ( $F^0 - F$ ) of ADDSi1 in ACN/Water mixture (1:1) at 447 nm against concentration of fluoride ion b) Plot of change in emission intensity ( $F^0 - F$ ) of ADDSi2 in ACN/Water mixture (1:1) at 447 nm against concentration of fluoride ion.

**Figure S-24.** Photograph shows the change in emission intensity upon addition different of fluoride ion (TBAF) under UV lamp (365 nm).

**Table S-1.** Photophysical data of ADDSi1 in various solvents.

**Table S-2.** Photophysical data of ADDSi2 in various solvents.

**Table S-3.** Fluorescence lifetime data of ADDSi1 (ACN) upon addition different concentration of fluoride ion.

**Table S-4.** Fluorescence lifetime data of ADDSi2 (ACN) upon addition of different concentration of fluoride ion.

**Table S-5:** Fluorescence lifetime data of ADDSi1 (ACN/water mixture) upon addition of  $F^-$  ion.

**Table S-6:** Fluorescence lifetime data of ADDSi2 (ACN/water mixture) upon addition of  $F^-$  ion.

**Table S-7.** Limit of Detection comparison from the literature.

**Table S-8.** Kinetics data of ADDSi1 in ACN.

**Table S-9.** Kinetics data of ADDSi2 in ACN.

**Table S-10.** Kinetics data of ADDSi1 in ACN/Water (1:1).

**Table S-11.** Kinetics data of ADDSi2 in ACN/Water (1:1).

**Table S-12.** Kinetics data of ADDSi2 in ACN/Water (1:1) upon addition of NaF.

## **Materials and Methods**

### **Preparation of Stock solution of ADDSi1**

The stock solution was prepared by dissolving 1.73 mg of ADDSi1 (0.28 mM) in HPLC grade acetonitrile with a 10 mL standard measuring flask at room temperature. UV-Vis and fluorescence measurements and titration studies were carried out by taking 0.25 mL of ADDSi1 from this stock and diluted to 5 mL, so that the final concentration was 14  $\mu$ M.

### **Preparation of Stock solution of ADDSi2**

The stock solution was prepared by dissolving 1.38 mg of ADDSi2 (0.28 mM) in HPLC grade acetonitrile with a 10 mL standard measuring flask at room temperature. UV-Vis and fluorescence measurements and titration studies were carried out by taking 0.25 mL of ADDSi1 from this stock and diluted to 5 mL, so that the final concentration was 14  $\mu$ M.

### **Preparation of Stock solution of Tetra butyl ammonium fluoride (TBAF) in ACN**

The stock solution was prepared by dissolving 110 mg of TBAF in HPLC grade acetonitrile with a 5 mL (84 mM) standard measuring flask at room temperature.

### **Preparation of Stock solution of Sodium Fluoride (NaF) in water**

The stock solution was prepared by dissolving 315 mg of NaF in deionized water in a 10 mL (0.74 M) standard measuring flask at room temperature.

### **Preparation of various pH buffer solutions (3 -12)**

The stock solution of various pH buffer solutions ranging from 3 - 12 was prepared by mixing appropriate volume of acid (0.1 M) and conjugate base (0.1M) necessary for the required pH buffer. Calculation of the ratio of volume required for various pH buffer solutions was done by Henderson-Hasselbalch equation. The obtained stock solution (0.1 M) was further diluted to 10 mM and this was used for the fluorescence studies.

pH buffer solutions (3 - 6) – citrate buffer.

pH buffer solution (7 & 8) – phosphate buffer.

pH buffer solution ( 9 -12) – bicarbonate buffer.



## Parameters Used for Fluorescence Measurements

### Studies in ACN

Excitation wavelength = 373 nm; emission wavelength = 435 nm; excitation slit (nm) = 2; emission slit (nm) = 1.

### Studies in ACN/Water (1:1)

Excitation wavelength = 380 nm; emission wavelength = 447 nm; excitation slit (nm) = 2; emission slit (nm) = 1.

### NMR titration studies

NMR titration studies were carried out by taking 11.56 mM of ADDSi1 and then it was titrated against 0.5 eq, 1 eq and 2 eq of TBAF in DMSO-d<sub>6</sub>.

NMR titration studies were carried out by taking 12.36 mM of ADDSi2 and then it was titrated against 0.5 eq, 1 eq and 2 eq of TBAF in DMSO-d<sub>6</sub>.

### Detection limit

The detection limit of fluoride ion in acetonitrile and in mixed aqueous solution of ADDSi1 and ADDSi2 was calculated from the linear plot of change in emission intensity ( $F^o - F$ ) against concentration of fluoride ion. To estimate detection limit we used equation  $3\sigma/s$ , where  $\sigma$  and  $s$  represent the standard deviation of blank measurements and the slope obtained from the linear plot of change in emission intensity against concentration of fluoride ion.

### Kinetics

Fluoride triggered desilylation kinetics (under pseudo first order condition) were followed by monitoring the change in emission intensity using Fluoromax - 4P spectrofluorimeter in kinetics mode. In acetonitrile, time course of desilylation reaction of ADDSi1 and ADDSi2 (14  $\mu$ M) with different concentrations of F<sup>-</sup> were recorded by monitoring the emission intensity change at 435 nm ( $\lambda_{ex} = 373$  nm), whereas in ACN/water mixture it is monitored at 447 nm ( $\lambda_{ex} = 380$  nm). These pseudo first order decay kinetics were fitted by applying Guggenheim's method. The plot of  $\ln(I_f - I_0 / I_f - I)$  Vs **time** generates a straight line and the slope of this line is the pseudo first order rate constant (where  $I_0$  is the intensity at zero

time  $t$ ,  $I_f$  is the final intensity,  $I$  is the intensity at time  $t$ ), which is a function of concentration of fluoride ion.

In acetonitrile, the plot between pseudo first order rate constant at different concentrations of fluoride ion does not generate a straight line, but a plot between  $\ln(k_{obs})$  Vs  $\ln[F^-]$  produces a straight line with the slope corresponding to the order of the reaction and the intercept is the third rate constant. But in case of ACN/Water mixture the plot between  $k_{obs}$  Vs  $[F^-]$  does produce a straight line, and the slope of the line is the second order rate constant.

### Detection of Fluoride ion in toothpaste

Soluble fluoride content in three commercially available toothpastes and one mouth wash were validated using the fluorescent probe ADDSi2. Tooth paste **A** (257.9 mg), Tooth paste **B** (299.5 mg), Tooth paste **C** (283.1 mg) and 1g of mouth wash were weighed and the samples were dispersed in 25mL of water. The resulting turbid solution was stirred for 15 min and then it was centrifuged at 4000 rpm for 15 min. After centrifuge, 0.5 mL of supernatant solution was taken from each test sample and it was titrated against ADDSi2 solution. The extent of quenching for each sample were fitted to a calibration curve (produced from standard NaF solution) and the amount of fluoride in toothpastes **A**, **B**, **C** and mouth wash were quantitatively determined.

Dimedone, 4-hydroxybenzaldehyde, tert-butyl(chloro)diphenylsilane, tert-butyl(dimethyl)silyl chloride, Sodium Fluoride and all anions as tetrabutylammonium salts, were purchased from Sigma Aldrich Chemicals Pvt. Ltd., and were used as received. Solvents used for the photophysical studies were of HPLC grade, purchased from Qualigens India Ltd. Analytical grade solvents were used for the synthesis and purification purpose.

IR spectra were recorded on BRUKER FTIR-VERTEX 70 spectrometer.  $^1H$  and  $^{13}C$ -NMR spectra were recorded on a Bruker 400 MHz instrument. The residual solvent peaks were used as internal standards. Chemical shifts are reported in ppm and coupling constants ( $J_{X-X'}$ ) are reported in Hz. Bruker Maxis ESI-TOF mass analyzer type was used for the HRMS measurements. Absorption spectra were recorded using Varian Cary Bio 100 UV-Vis spectrophotometer. Fluorescence spectral measurements were carried out using Horiba-Jobin

Yvon Fluoromax-4P fluorescence spectrometer. Fluorescence quantum yields were obtained from the corrected fluorescence spectra using the expression,

$$\Phi_f = (A_s/A_r) (a_r/a_s) (n_s/n_r) \times 0.546$$

where  $A_s$  and  $A_r$  are the area under the corrected fluorescence spectrum,  $a_s$  and  $a_r$  are the absorbance at the wavelength of excitation (366 nm),  $n_s$  and  $n_r$  are the refractive indices of the solvent for the sample and reference respectively. Quinine sulphate in 0.1 N sulphuric acid was used as the reference ( $\Phi_f$  of quinine sulphate is 0.546). The fluorescence decay measurements of dyes used in the present study were recorded using IBH time correlated single photon counting spectrometer (TCSPC), with micro channel plate photomultiplier tube (MCP-PMT) as detector and femtosecond laser as the excitation source.

## Synthesis of ADDSi1 & ADDSi2

### 2,2'-((4-hydroxyphenyl)methylene)bis(5,5-dimethylcyclohexane-1,3-dione)

To a solution of dimedone (2.0 g, 14.26 mmol) in aqueous methanol, 4-hydroxybenzaldehyde was added (0.87 g, 7.13 mmol) and the reaction mixture was warmed until the solution became cloudy. Then the reaction mixture was diluted with water (250 mL) the solid obtained was filtered, dried and recrystallized using methanol. (Yield : 90%) (m.p. above 200°C)

### 9-(4-hydroxyphenyl)-3,3,6,6-tetramethyl-3,4,6,7,9,10-hexahydroacridine-1,8(2H,5H)-dione.

A mixture of tetraketone (1.0 g, 2.6 mmol) and methyl amine (0.48 g, 15.6 mmol) in acetic acid (20 mL) was kept under reflux for 8 hours. Then the reaction mixture was cooled and poured over crushed ice. The solid obtained was filtered and dried. The compound obtained was purified by silica gel column chromatography and eluted with  $\text{CHCl}_3$  : MeOH (96:4, v/v) to get the pure ADDOH.(83%) (m.p. above 250°C). IR (KBr): 3267.08 (br, -OH), 2960.59 & 2869.74 (s, aromatic CH) 1629.25, (s, C=O), 1370.77 (s, -C=C-)  $\text{cm}^{-1}$ .  $^1\text{H}$  NMR : 400MHz, DMSO- $d_6$ :  $\delta$  ppm; 0.94 and 0.99 (2s, 12H, gem- dimethyl); 2.06-2.15 (ABq, 4H, methylene proton); 2.38-2.77 (2d, 4H, J=22Hz, methylene proton); 3.25 (s, 3H, N- $\text{CH}_3$ ); 4.91(s, 1H, C $_9$ -H) 6.50 - 6.53(d, 2H, J=10.5Hz, Ar-H); 6.85-6.87 (d, 2H, J=10.5Hz, Ar-H); 9.00(s, 1H, O-H).  $^{13}\text{C}$  NMR: 100 MHz,

DMSO-d<sub>6</sub>;  $\delta$  ppm; 28.22, 28.82, 30.16, 32.61, 33.69, 39.62, 50.04, 113.69, 114.96, 128.44, 137.11, 152.73, 155.61, 195.28.

**9-(4-(tert-butyldiphenylsilyloxy)phenyl)-3,3,6,6,10-pentamethyl-3,4,6,7,9,10-hexahydro acridine-1,8(2H,5H)-dione (ADDSi1).**

ADDOH (400 mg, 1.05 mmol) and t-butyldiphenylchlorosilane (800 mg, 3.16 mmol) were dissolved in 20 mL of pyridine and the resulting solution was kept at 50°C for 12 hours. Then the reaction mixture was poured into 30 mL of 6% HCl in an ice bath and the resulting solution was extracted with DCM (3  $\times$  15 mL). The combined organic layer was dried over sodium sulphate and evaporated under reduced pressure. Then the crude product was purified by silica gel (100–200 mesh) column chromatography (CHCl<sub>3</sub>–MeOH 98:2) to yield a yellow solid (Yield: 80%). (m.p. above 250°C). <sup>1</sup>H NMR : 400 MHz, DMSO-d<sub>6</sub>;  $\delta$  ppm; 0.81 and 0.90 (2s, 12H, gem – dimethyl proton ); 0.92 (s, 9H, t-butyl proton); 1.97 – 2.06 (ABq, 4H, methylene proton); 2.28 - 2.32 (d, 2H, J=17.6 Hz, methylene proton); 2.63 – 2.67 (d, 2H, J=17.2Hz); 3.13 (s, 3H, N-CH<sub>3</sub>); 4.84 (s, 1H, C9-H) 6.43 - 6.45 (d, 2H, J=8.4 Hz, Ar-H); 6.75-6.77 (d, 2H, J=8 Hz, Ar-H); 7.30 – 7.38 (m, 6H, Ar-H); 7.53 – 7.55 (d, 4H, J = 7.2 Hz, Ar-H). <sup>13</sup>C NMR :100 MHz, DMSO -d<sub>6</sub>;  $\delta$  ppm 19.37, 26.78, 28.04, 30.20, 32.57, 33.67, 49.94, 113.31, 118.97, 128.42, 130.59, 132.59, 135.47, 139.50, 152.94, 153.28, 195.24. HRMS, m/z = 618.3398 [M + 1]<sup>+</sup>.

**9-(4-(tert-butyldimethylsilyloxy)phenyl)-3,3,6,6,10-pentamethyl-3,4,6,7,9,10-hexahydroacridine-1,8(2H,5H)-dione (ADDSi2).**

ADDOH (500 mg, 1.31 mmol) and t-butyldimethylchlorosilane (490 mg, 3.29 mmol) were dissolved in 20 mL of pyridine and the resulting solution was kept at 50°C for 12 hours. The completion of the reaction was monitored by TLC. The reaction mixture was poured into 30 mL of 6% HCl in an ice bath and the resulting solution was extracted with DCM (3  $\times$  15 mL). The combined organic layer was dried over sodium sulphate and evaporated under reduced pressure. Then the crude product was purified by silica gel (100–200 mesh) column chromatography (CHCl<sub>3</sub>–MeOH 98:2) to yield a yellow solid (Yield: 78%). <sup>1</sup>H NMR :400 MHz, DMSO-d<sub>6</sub>;  $\delta$  ppm; 0.11 (1s, 6H, Si-CH<sub>3</sub>); 0.891 (s, 9H, t-butyl proton); 0.919 and 0.988 (2s, 12H, gem – dimethyl proton ); 2.060 – 2.154 (ABq, 4H, methylene proton); 2.386 - 2.429 (d, 2H, J=17.2 Hz,

methylene proton); 2.728 – 2.772 (d, 2H, J=17.6Hz); 3.250 (s, 3H, N-CH<sub>3</sub>); 4.957 (s, 1H, C<sub>9</sub>-H) 6.588 - 6.609 (d, 2H, J=8.4 Hz, Ar-H); 6.933-6.954 (d, 2H, J=8.4 Hz, Ar-H). <sup>13</sup>C NMR : 100 MHz, DMSO -d<sub>6</sub>; δ ppm; -4.03, 18.33, 26.02, 28.05, 28.87, 30.32, 32.57, 33.70, 50.02, 113.47, 119.37, 128.54, 139.52, 152.88, 153.35, 195.23. HRMS, m/z = 494.3086 [M + 1]<sup>+</sup>.

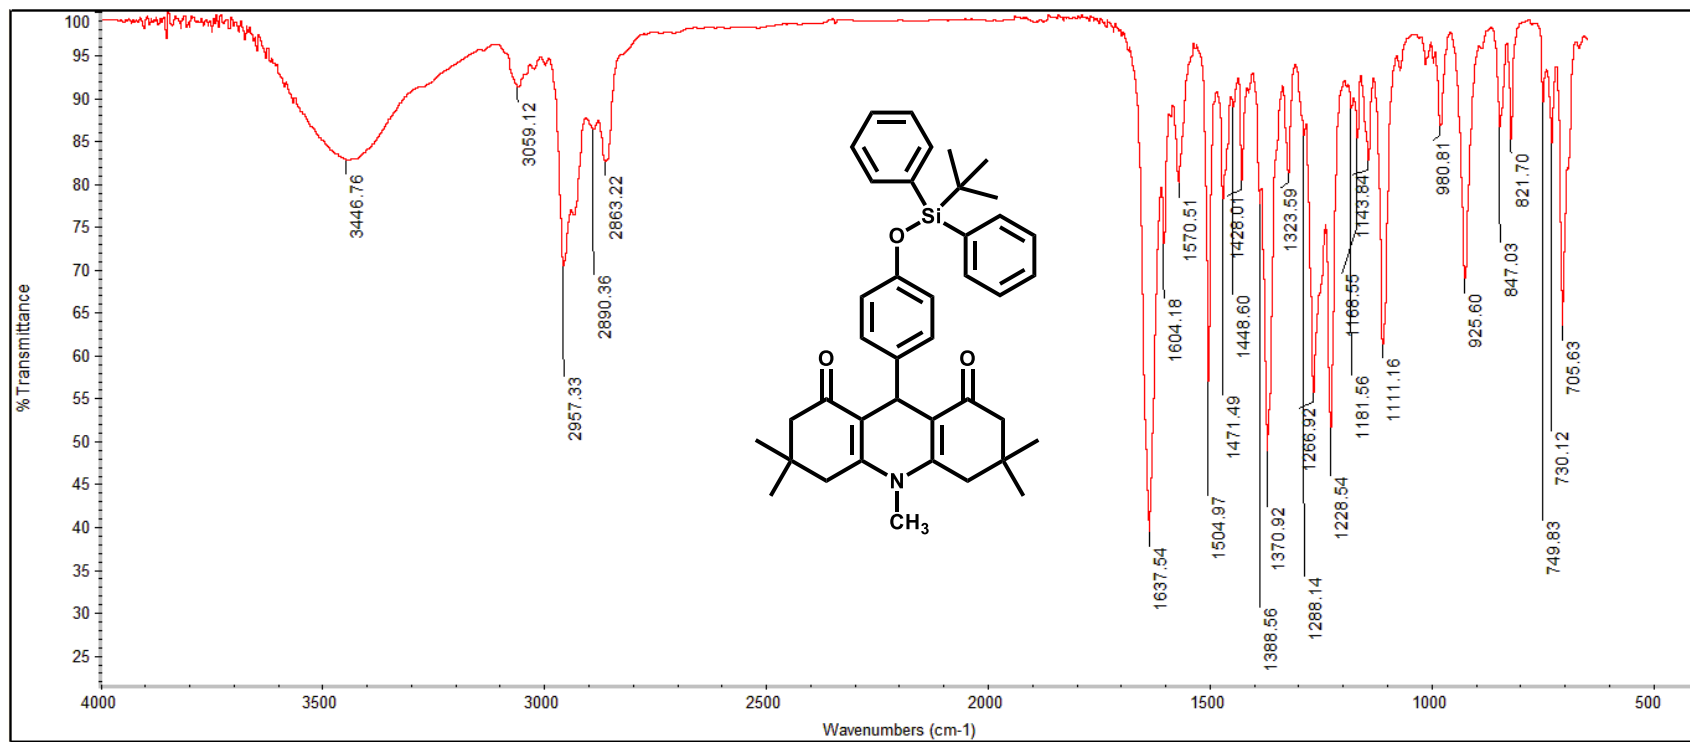

**Figure S-1.** IR Spectrum of ADDSi1

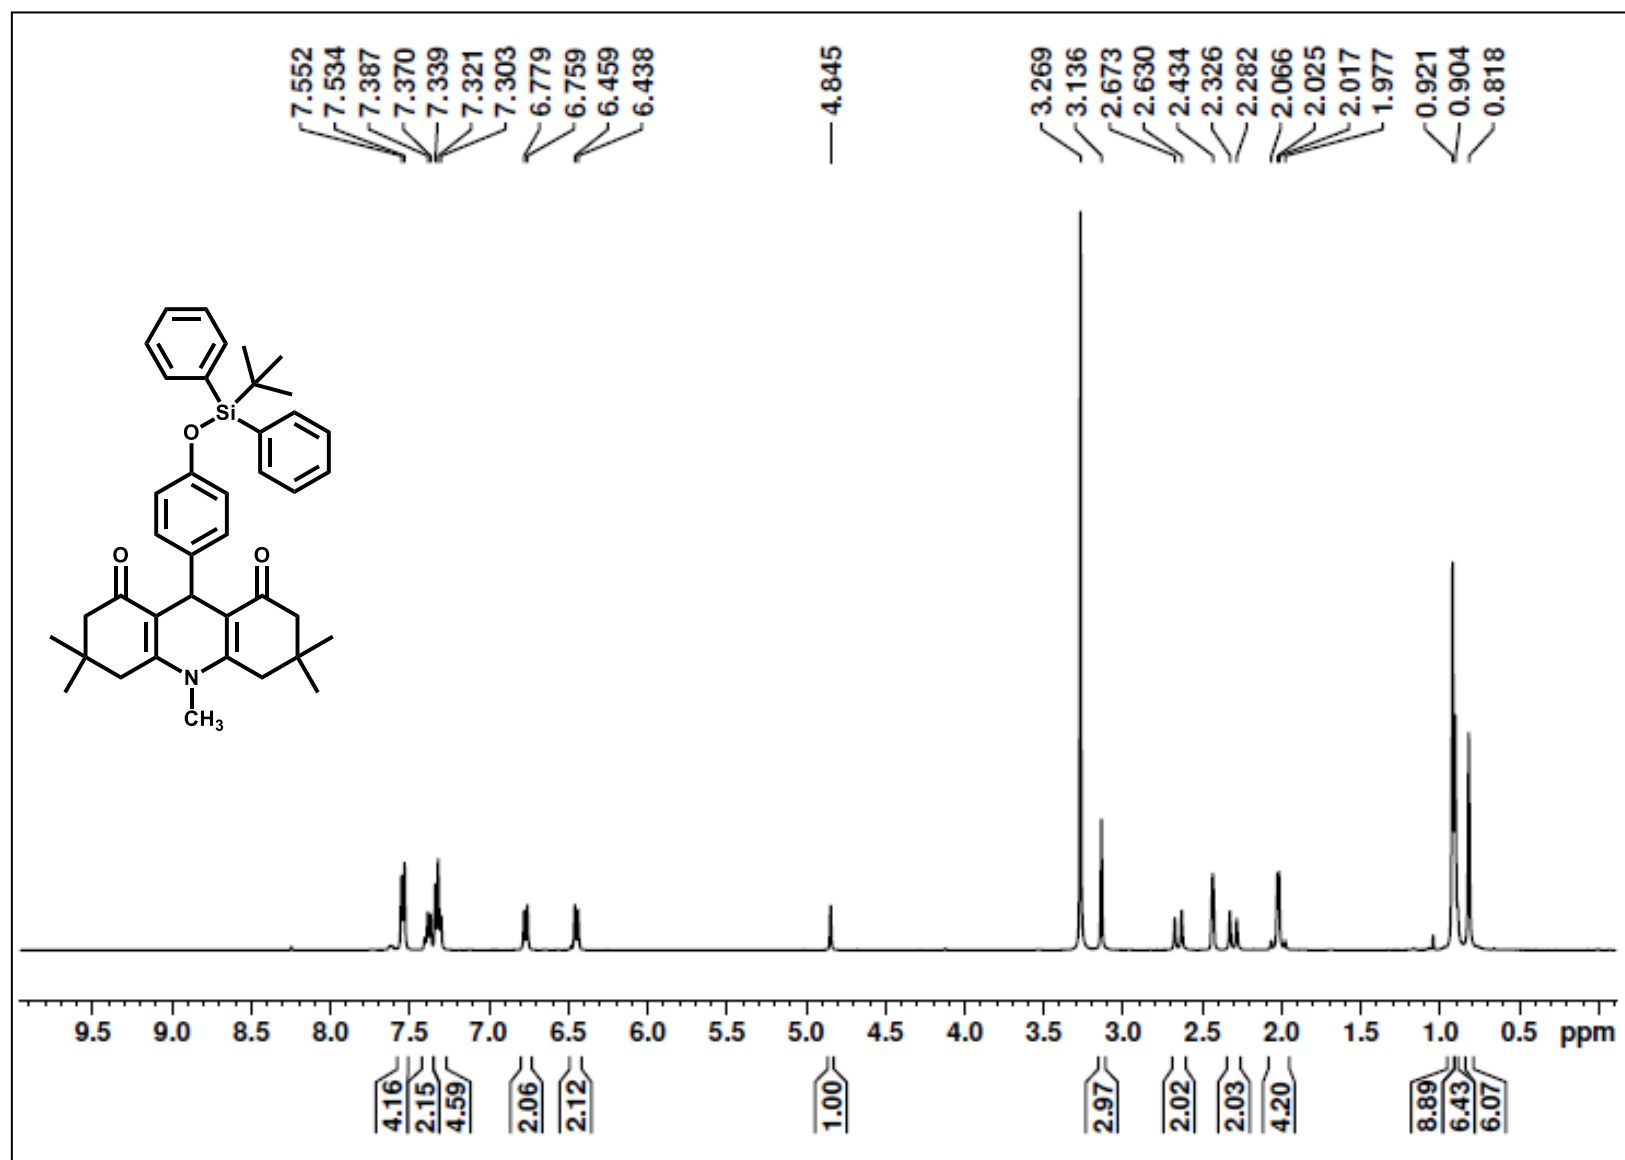

**Figure S-2.**  $^1\text{H}$  NMR Spectrum of ADDSi1 in  $\text{DMSO-d}_6$

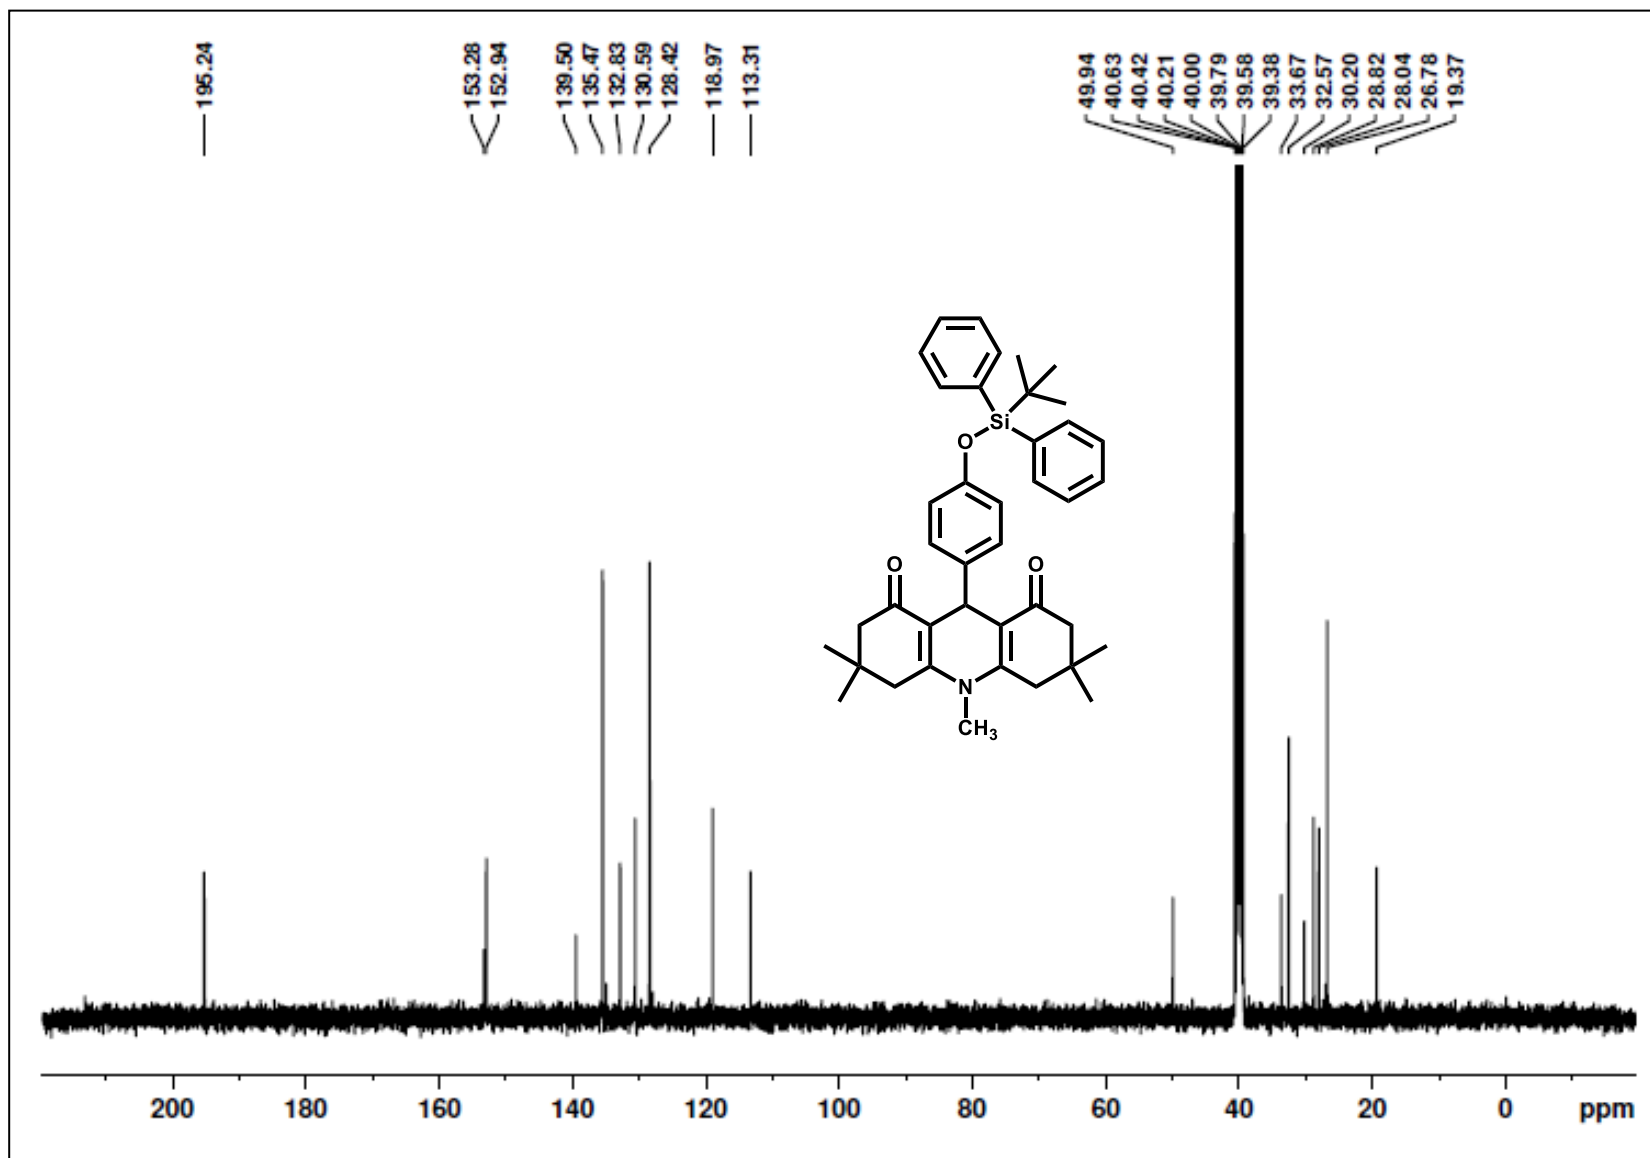

Figure S-3.  $^{13}\text{C}$  NMR Spectrum of ADDSi1 in  $\text{DMSO-d}_6$



# UOH -SCHOOL OF CHEMISTRY -HRMS

## Analysis Info

Analysis Name D:\Data\2016\DR. NAGRAJAN\JUNE\GR-S1.d  
 Method tune\_low\_Pos-R2.m  
 Sample Name GR-S1-MEOH  
 Comment

Acquisition Date 6/13/2016 12:55:40 PM

Operator Rajesh Vashisth  
 Instrument maXis 10138

## Acquisition Parameter

|             |            |                       |           |                  |           |
|-------------|------------|-----------------------|-----------|------------------|-----------|
| Source Type | ESI        | Ion Polarity          | Positive  | Set Nebulzer     | 0.3 Bar   |
| Focus       | Not active | Set Capillary         | 3800 V    | Set Dry Heater   | 180 °C    |
| Scan Begin  | 50 m/z     | Set End Plate Offset  | -500 V    | Set Dry Gas      | 4.0 l/min |
| Scan End    | 2580 m/z   | Set Collision Cell RF | 350.0 Vpp | Set Divert Valve | Waste     |

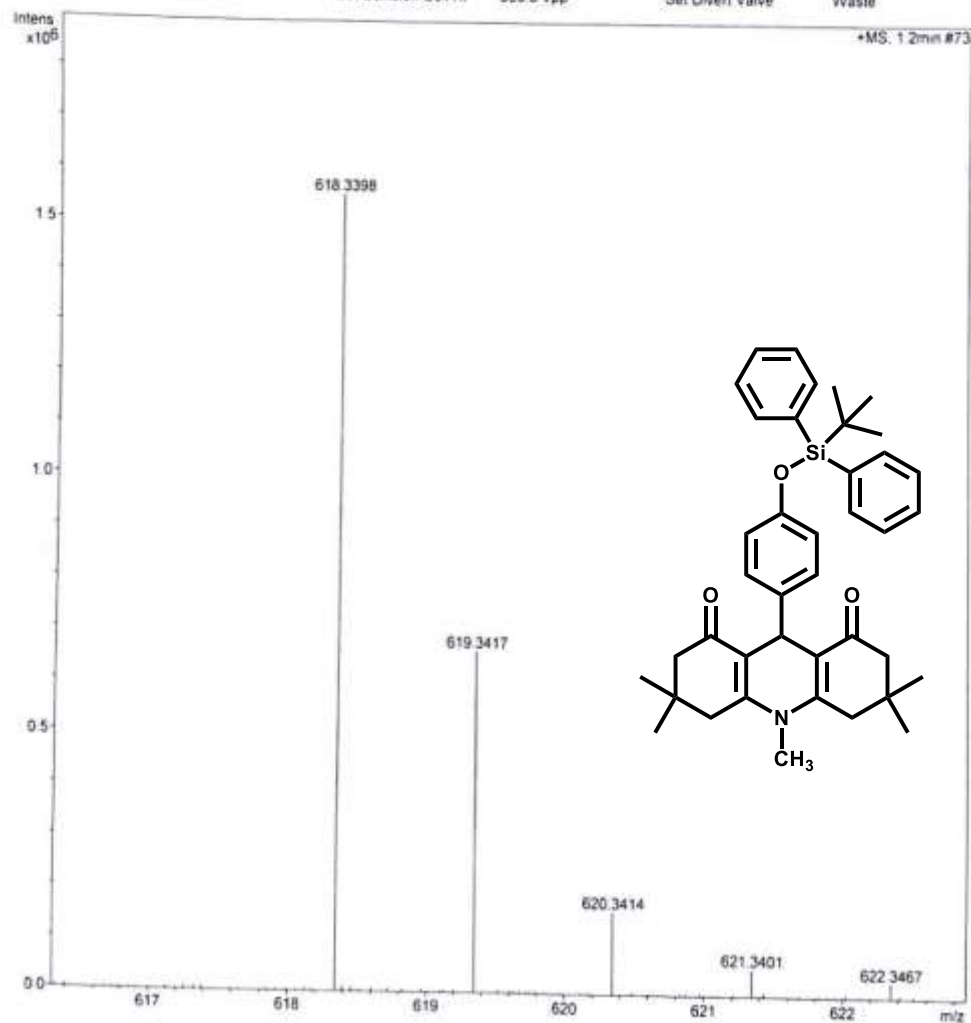

Bruker Compass DataAnalysis 4.0

printed: 6/13/2016 1:00:14 PM

Page 1 of 1

**Figure S-4.** HRMS of ADDSi1

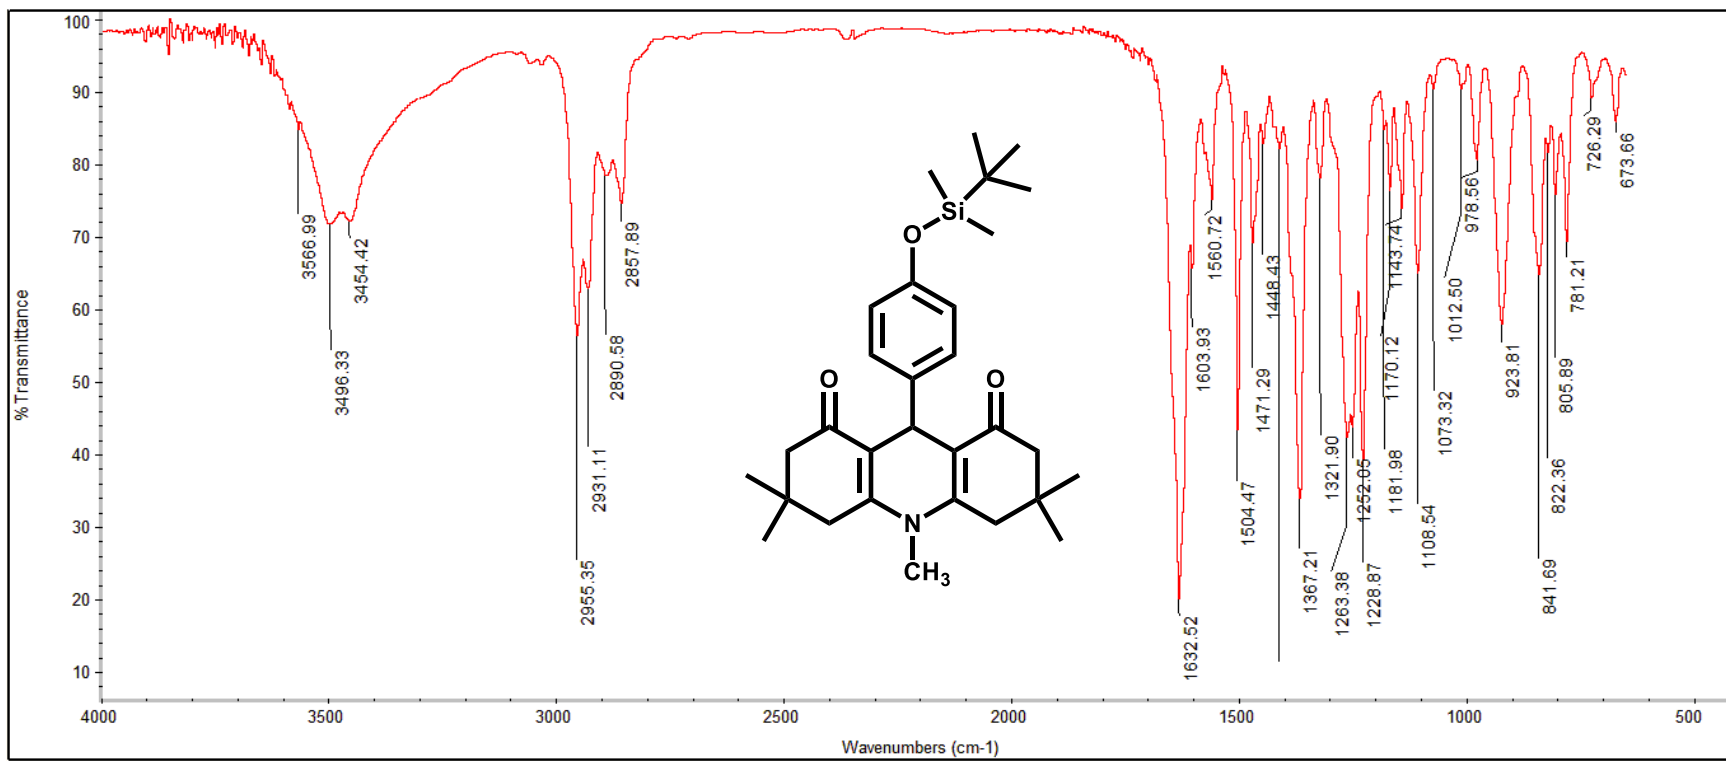

Figure S-5. IR Spectrum of ADDSi2

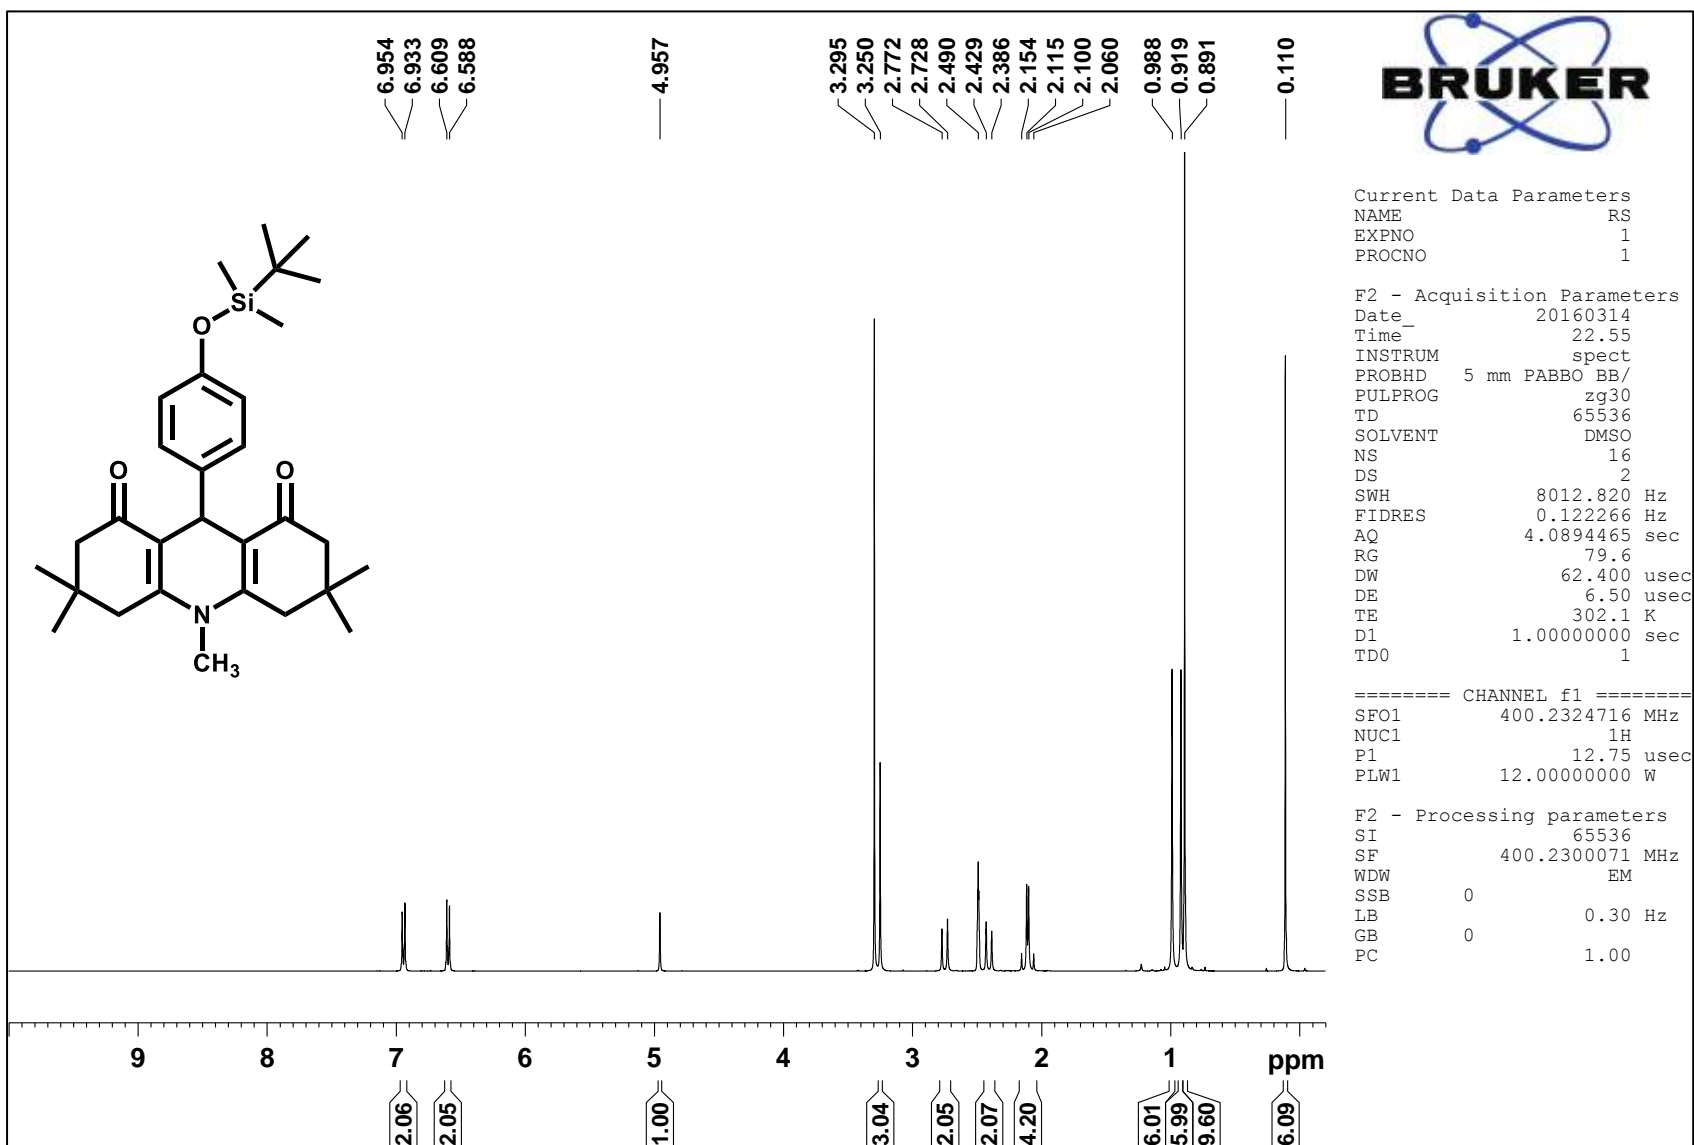

Figure S-6. <sup>1</sup>H NMR Spectrum of ADDSi2 in DMSO-d<sub>6</sub>

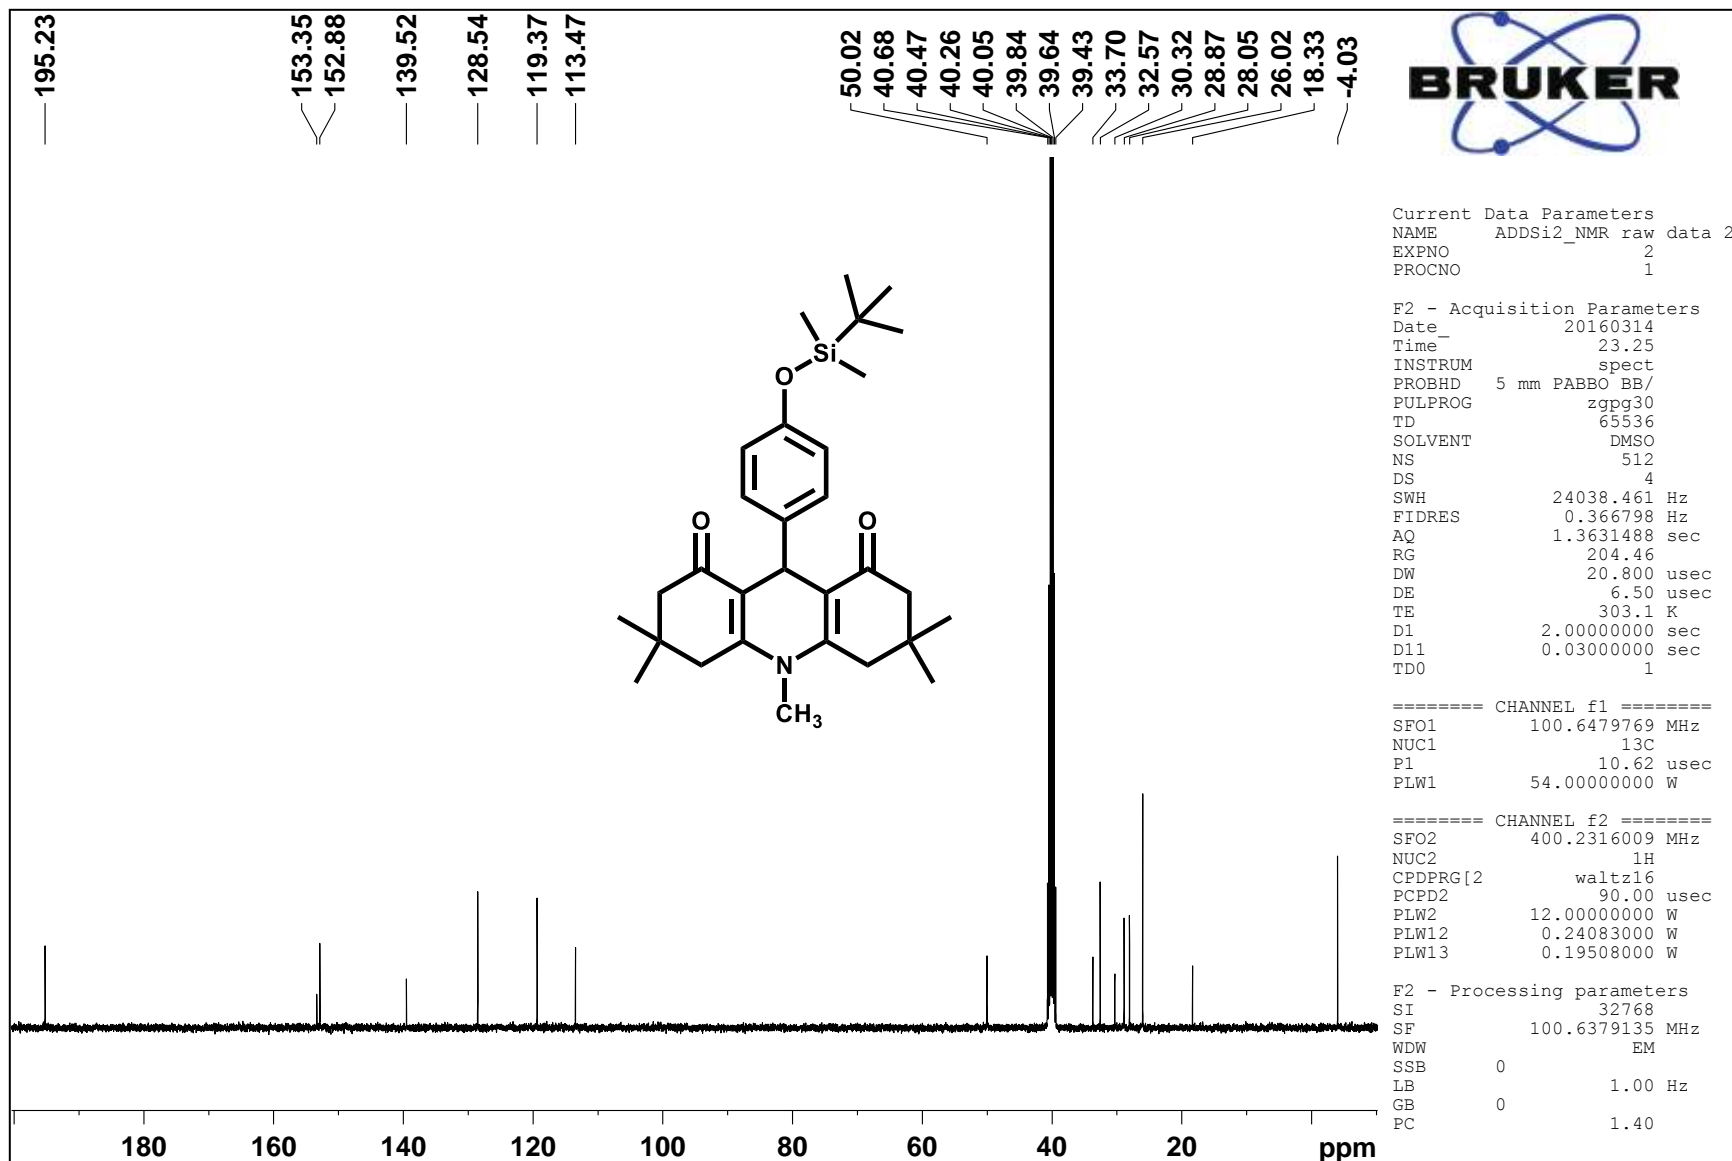

Figure S-7.  $^{13}\text{C}$  NMR Spectrum of ADDSi2 in DMSO- $\text{d}_6$

# UOH -SCHOOL OF CHEMISTRY -HRMS

## Analysis Info

Analysis Name D:\Data\2016\DR\_NAGRAJAN\JUNE\GR-S2.d  
Method tune\_low\_Pos-R2.m  
Sample Name GR-S2-MEOH  
Comment

Acquisition Date 6/13/2016 12:45:43 PM

Operator Rajesh Vashisth  
Instrument maXis 10138

## Acquisition Parameter

|             |            |                       |           |                  |           |
|-------------|------------|-----------------------|-----------|------------------|-----------|
| Source Type | ESI        | Ion Polarity          | Positive  | Set Nebulizer    | 0.3 Bar   |
| Focus       | Not active | Set Capillary         | 3800 V    | Set Dry Heater   | 180 °C    |
| Scan Begin  | 50 m/z     | Set End Plate Offset  | -500 V    | Set Dry Gas      | 4.0 l/min |
| Scan End    | 2580 m/z   | Set Collision Cell RF | 350.0 Vpp | Set Divert Valve | Waste     |

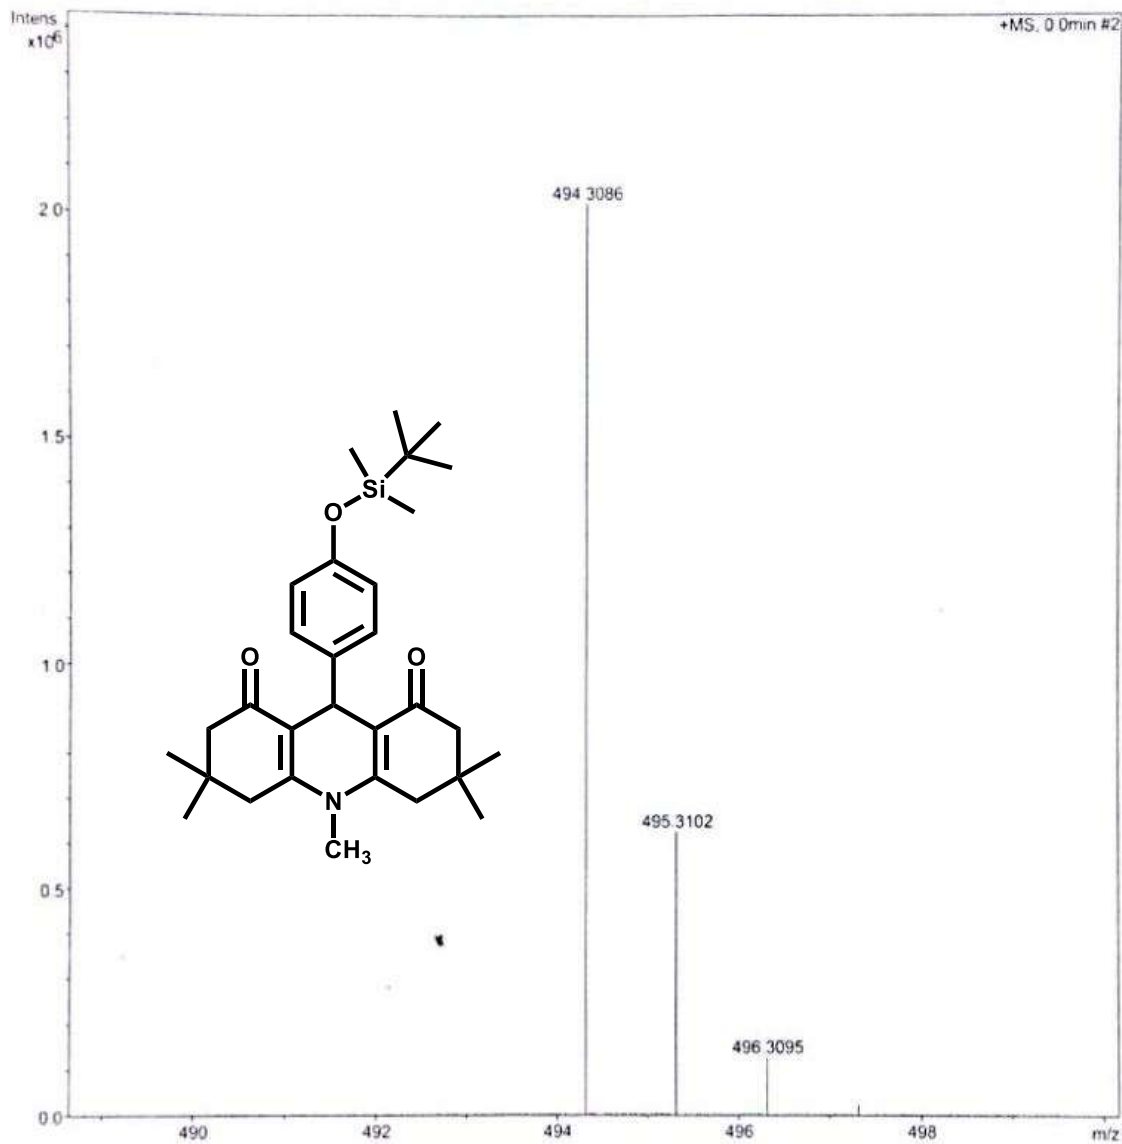

**Figure S-8.** HRMS of ADDSi2

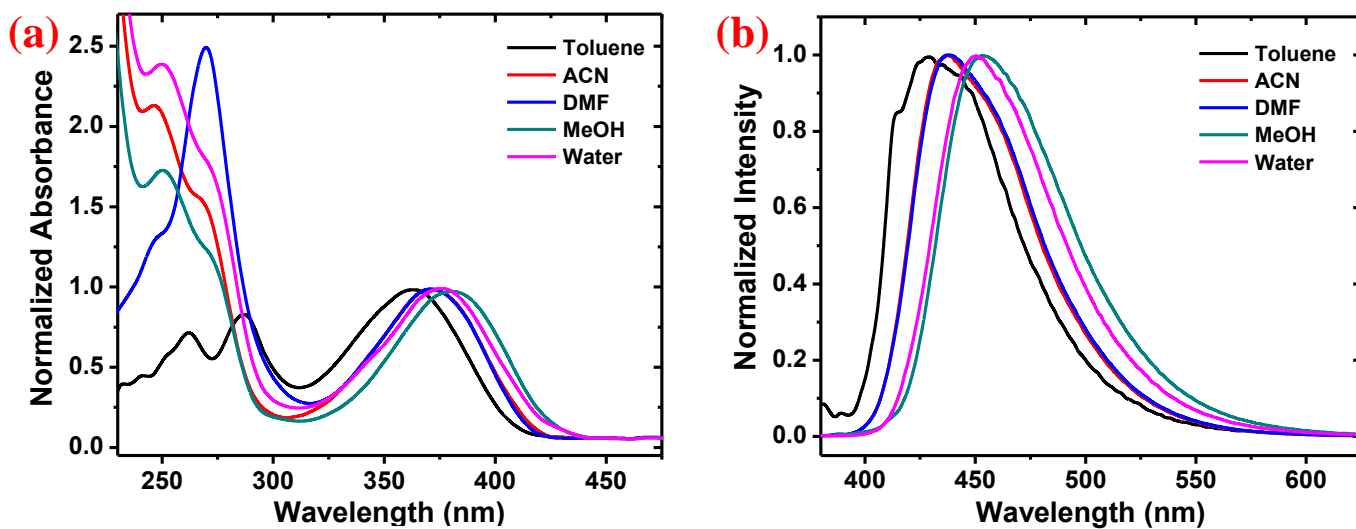

**Figure S-9.** a) Absorption Spectrum of ADDSi1 in various solvents. b) Emission Spectrum of ADDSi1 in various solvents.

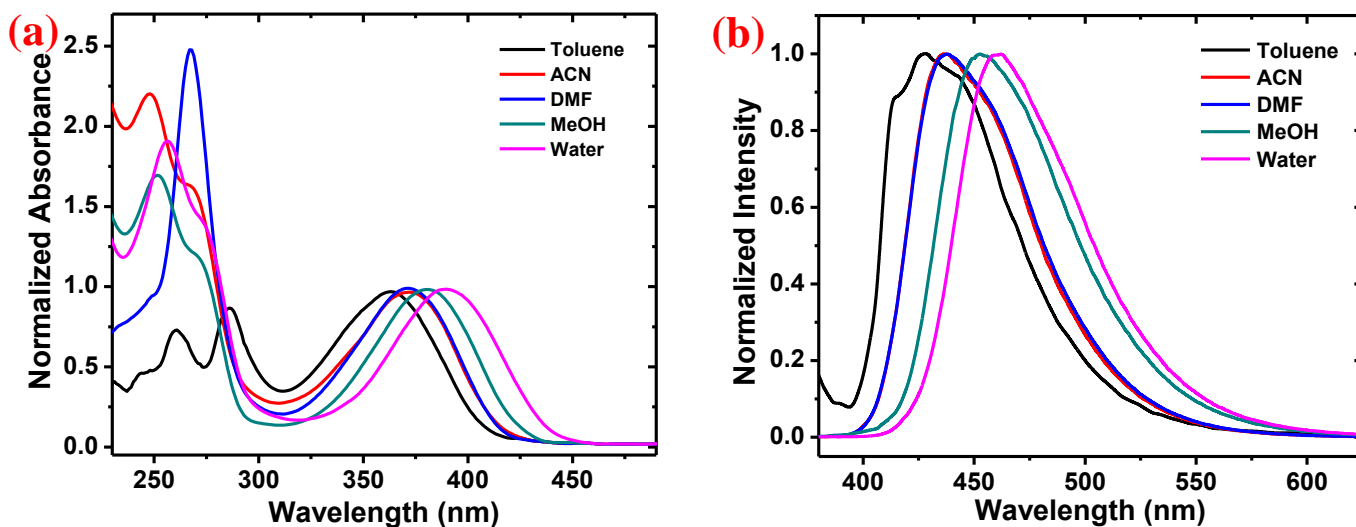

**Figure S-10.** a) Absorption Spectrum of ADDSi2 in various solvents. b) Emission Spectrum of ADDSi2 in various solvents.

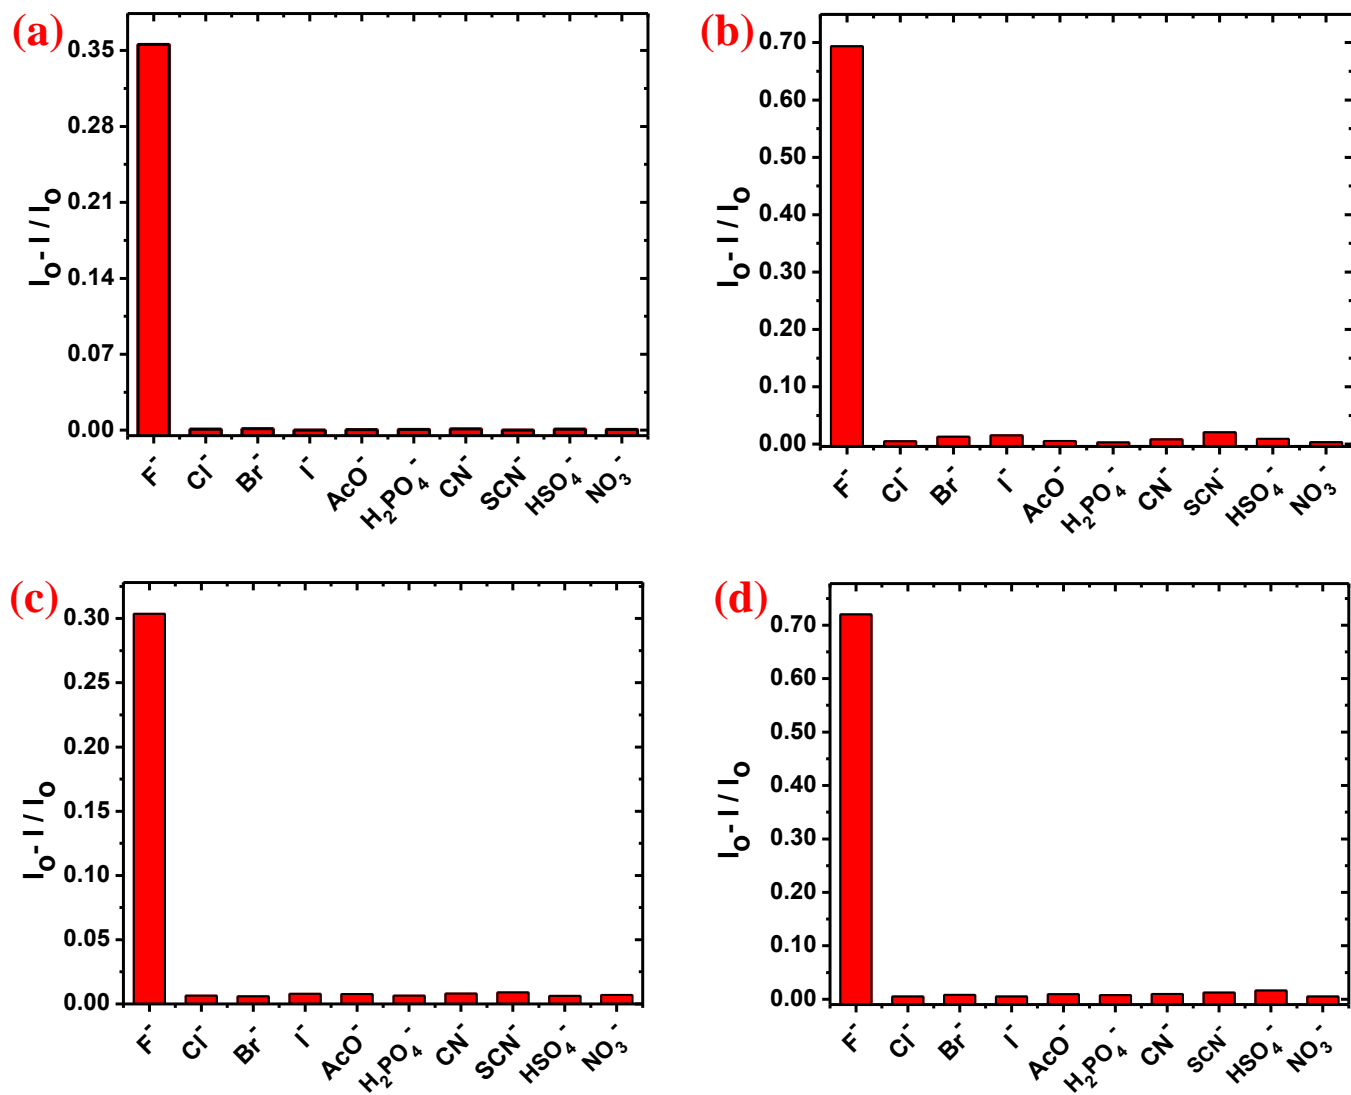

**Figure S-11.** Selectivity of studies a) ADDSi1 (14  $\mu$ M) in ACN b) ADDSi2 (14  $\mu$ M) in ACN c) ADDSi1 (14  $\mu$ M) in ACN/Water (1:1) d) ADDSi2 (14  $\mu$ M) in ACN/Water (1:1). Anions Concentration (200  $\mu$ M).

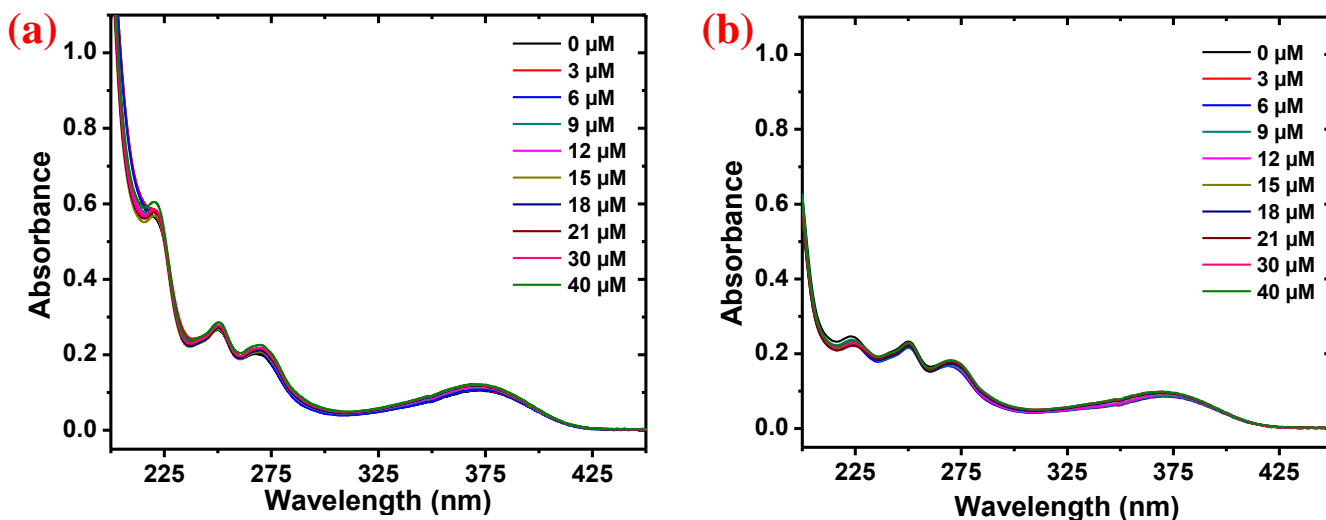

**Figure S-12.** a) Variation in Absorption Spectra of ADDSi1 (14 μM) in ACN upon addition of different concentrations of fluoride anion (TBAF). b) Variation in Absorption Spectra of ADDSi2 (14 μM) in ACN upon addition of different concentrations of fluoride anion (TBAF).

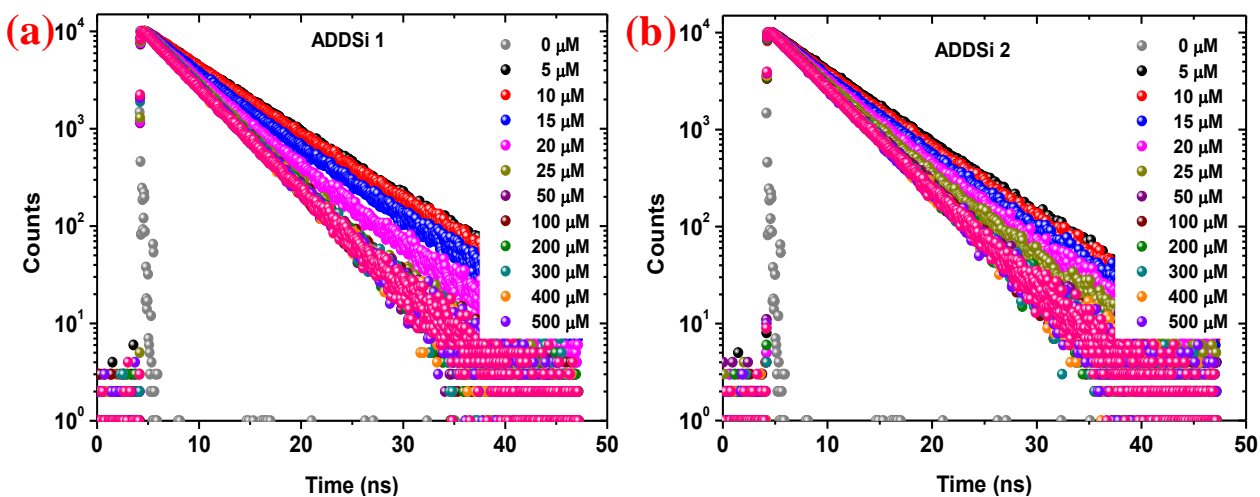

**Figure S-13.** a) Variation in fluorescence lifetime decay of ADDSi1 (14 μM) in ACN : H<sub>2</sub>O (1:1) upon addition of different concentrations of fluoride anion (TBAF). b) Variation in fluorescence lifetime decay of ADDSi2 (14 μM) in ACN : H<sub>2</sub>O (1:1) upon addition of different concentrations of fluoride anion (TBAF).



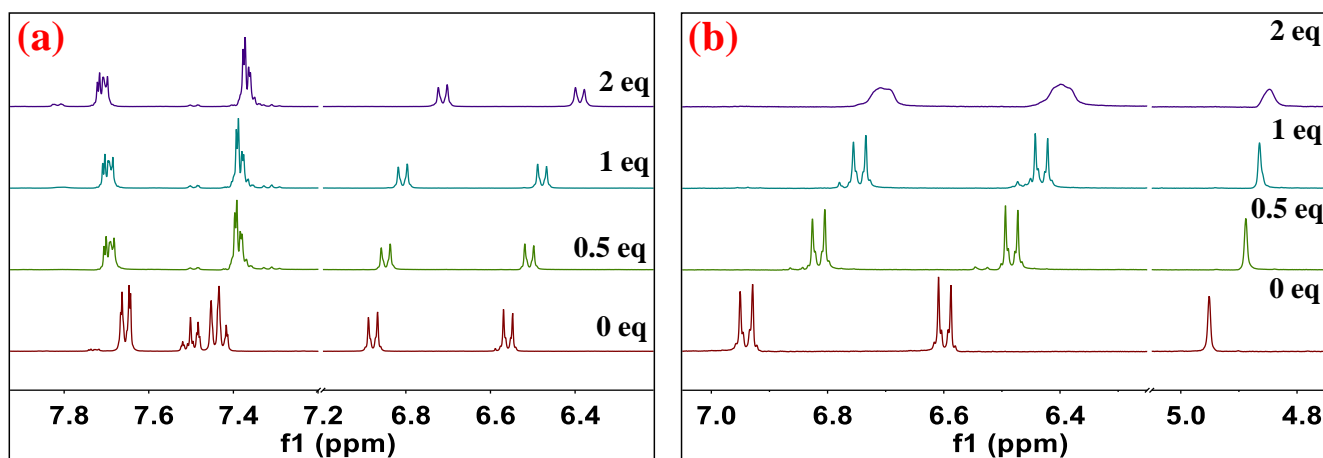

**Figure S-14.** Partial  $^1\text{H}$  NMR Spectrum of ADDSi1 (11.56 mM) in  $\text{DMSO-d}_6$  upon addition of fluoride ion (0 – 2 eq)

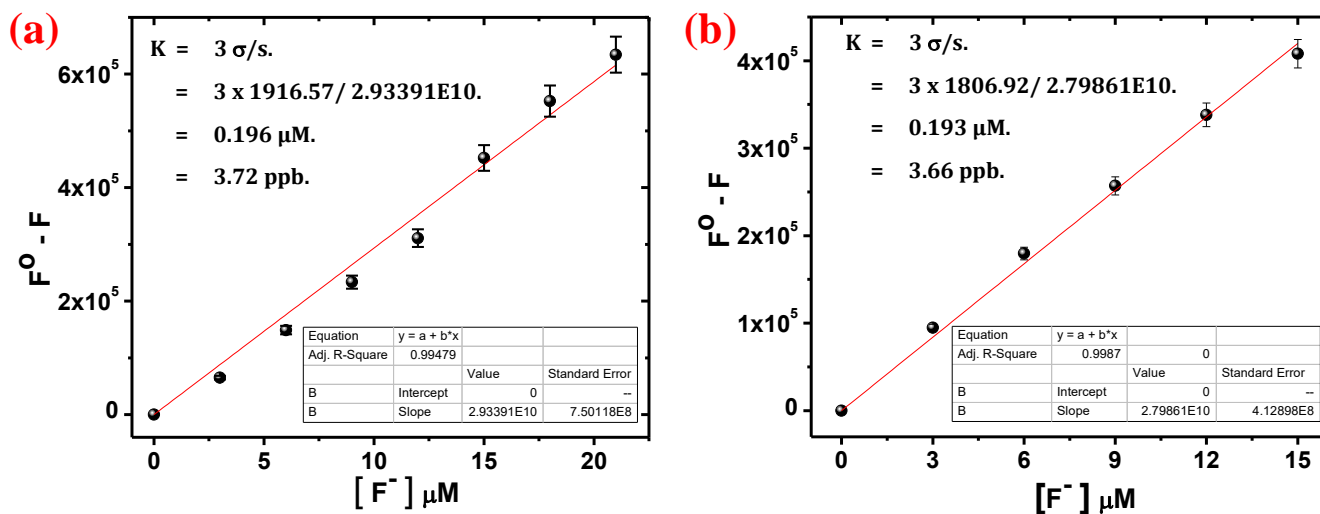

**Figure S-15. a)** Plot of change in emission intensity ( $F^0 - F$ ) of ADDSi1 in ACN at 435 nm against concentration of fluoride ion. **b)** Plot of change in emission intensity ( $F^0 - F$ ) of ADDSi2 in ACN at 435 nm against concentration of fluoride ion.

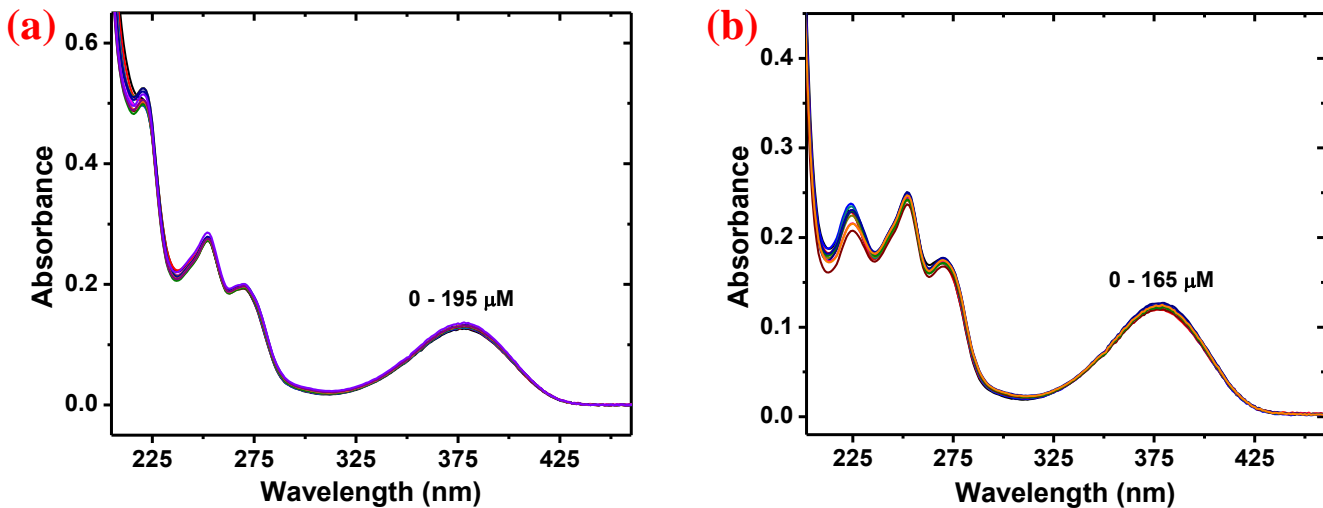

**Figure S-16.** a) Variation in Absorption Spectra of ADDSi1 (14  $\mu\text{M}$ ) in ACN/Water (1:1) upon addition of different concentrations of fluoride anion (TBAF). b) Variation in Absorption Spectra of ADDSi2 (14  $\mu\text{M}$ ) in ACN/Water (1:1) upon addition of different concentrations of fluoride anion (TBAF).

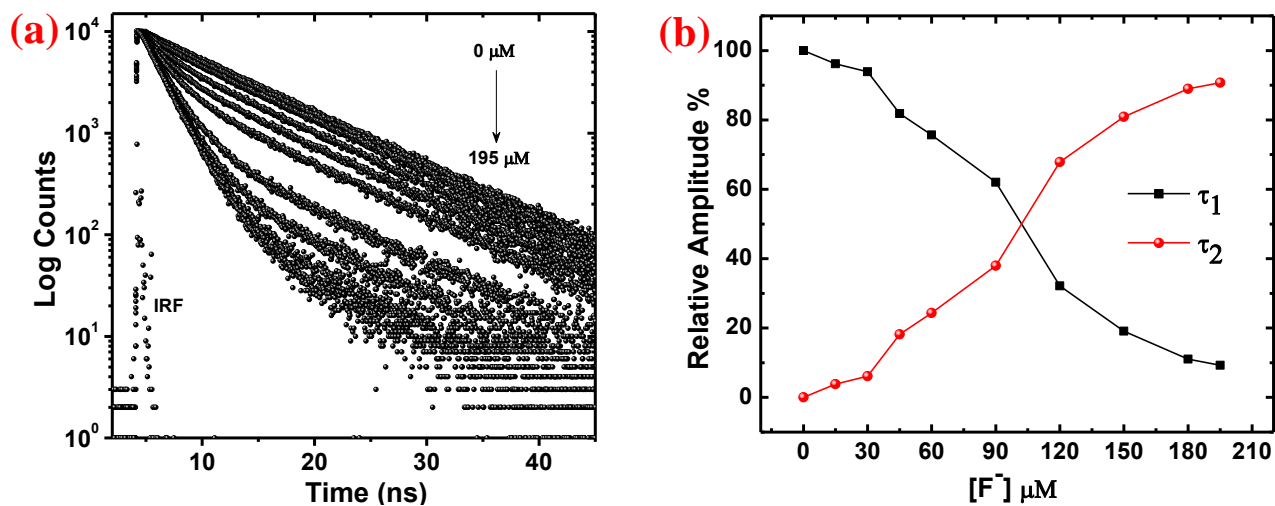

**Figure S-17.** a) Variation in fluorescence lifetime decay of ADDSi1 (14  $\mu\text{M}$ ) in ACN : H<sub>2</sub>O (1 : 1) upon addition of different concentrations of fluoride anion (TBAF). b) Plot of relative amplitudes of two lifetimes vs fluoride ion concentration.

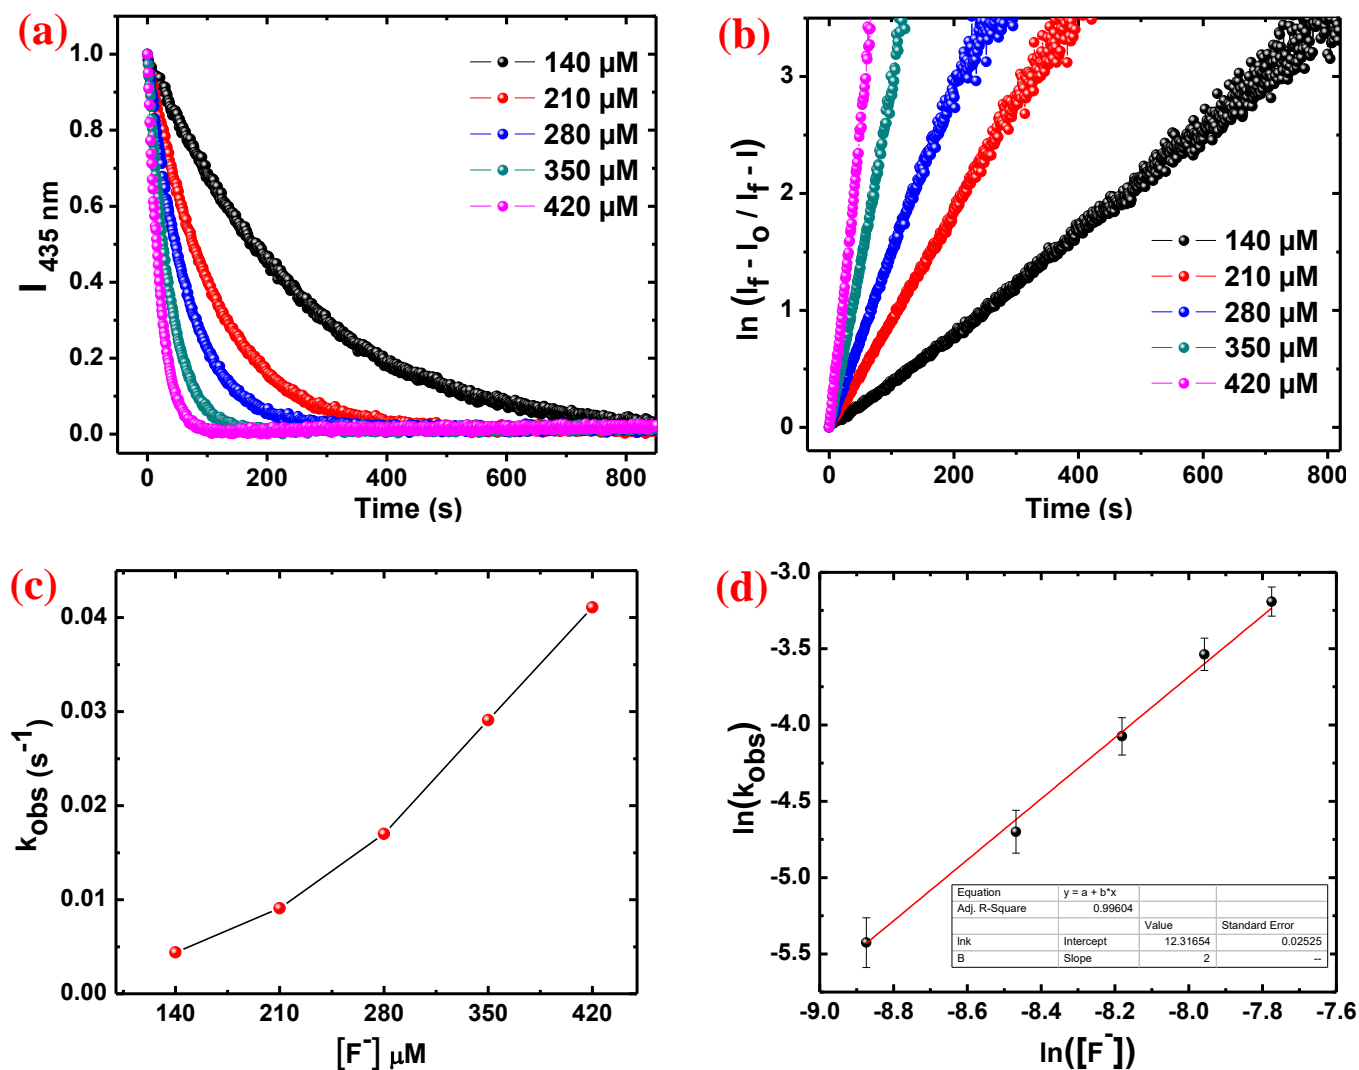

**Figure S-18.** **a)** Time course of desilylation reaction of ADDSi1 (14  $\mu\text{M}$ ) upon addition of different concentrations of TBAF (140 - 420  $\mu\text{M}$ ) in ACN by following emission change at 435 nm. **b)** Guggenheim plot for pseudo first order kinetics of desilylation reaction of ADDSi1 in ACN on addition of different concentrations of TBAF. **c)** Plot of fluoride concentration vs  $k_{\text{obs}}$  (ADDSi1 in ACN). **d)** Plot of  $\ln([\text{F}^-])$  vs  $\ln(k_{\text{obs}})$  (ADDSi1 in ACN).

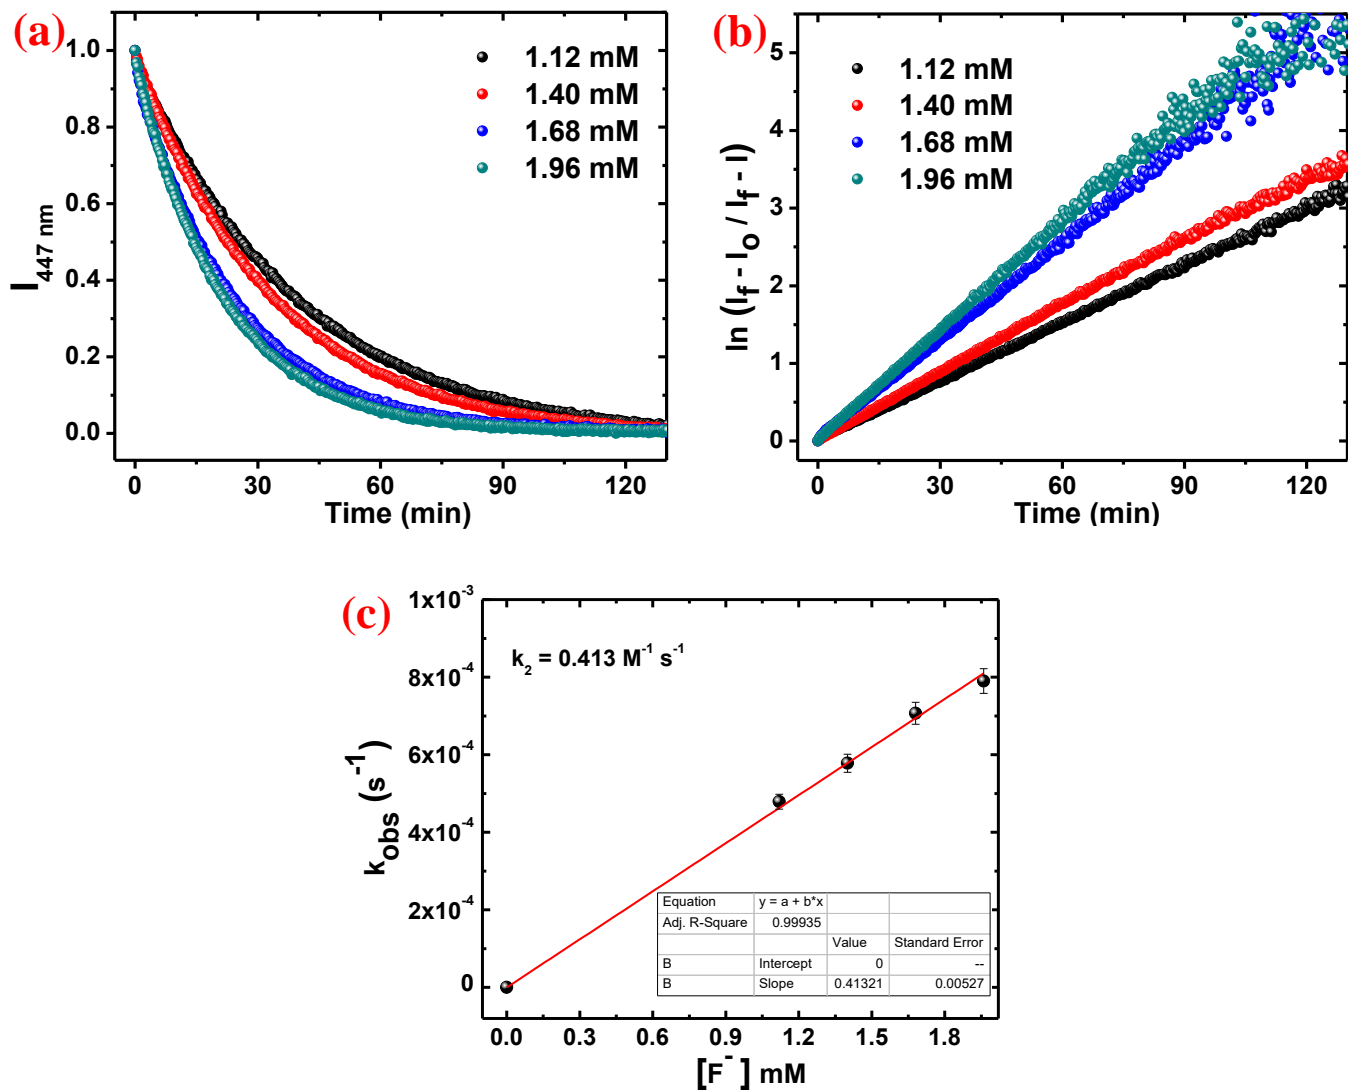

**Figure S-19.** a) Time course of desilylation reaction of ADDSi1 (14  $\mu\text{M}$ ) upon addition of different concentrations of TBAF (140 - 420  $\mu\text{M}$ ) in ACN/Water (1:1) by following emission change at 447 nm. b) Guggenheim plot for pseudo first order kinetics of desilylation reaction of ADDSi1 in ACN/Water (1:1) on addition of different concentrations of TBAF. c) Plot of fluoride concentration vs  $k_{\text{obs}}$  (ADDSi1 in ACN/Water (1:1)).

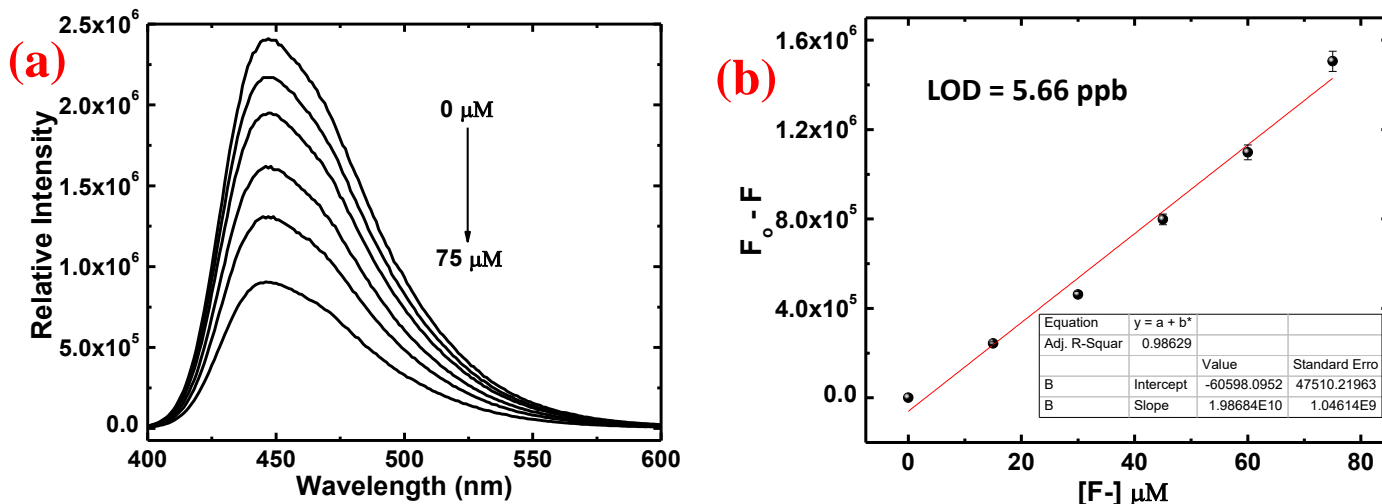

**Figure-20.** a) Variation in Emission Spectra of ADDSi2 (14  $\mu\text{M}$ ) in ACN/Water (1:1) upon addition of different concentrations of fluoride anion (NaF). b) Plot of change in emission intensity ( $F^0 - F$ ) of ADDSi2 in ACN/Water (1:1) at 447 nm against concentration of fluoride ion (NaF).

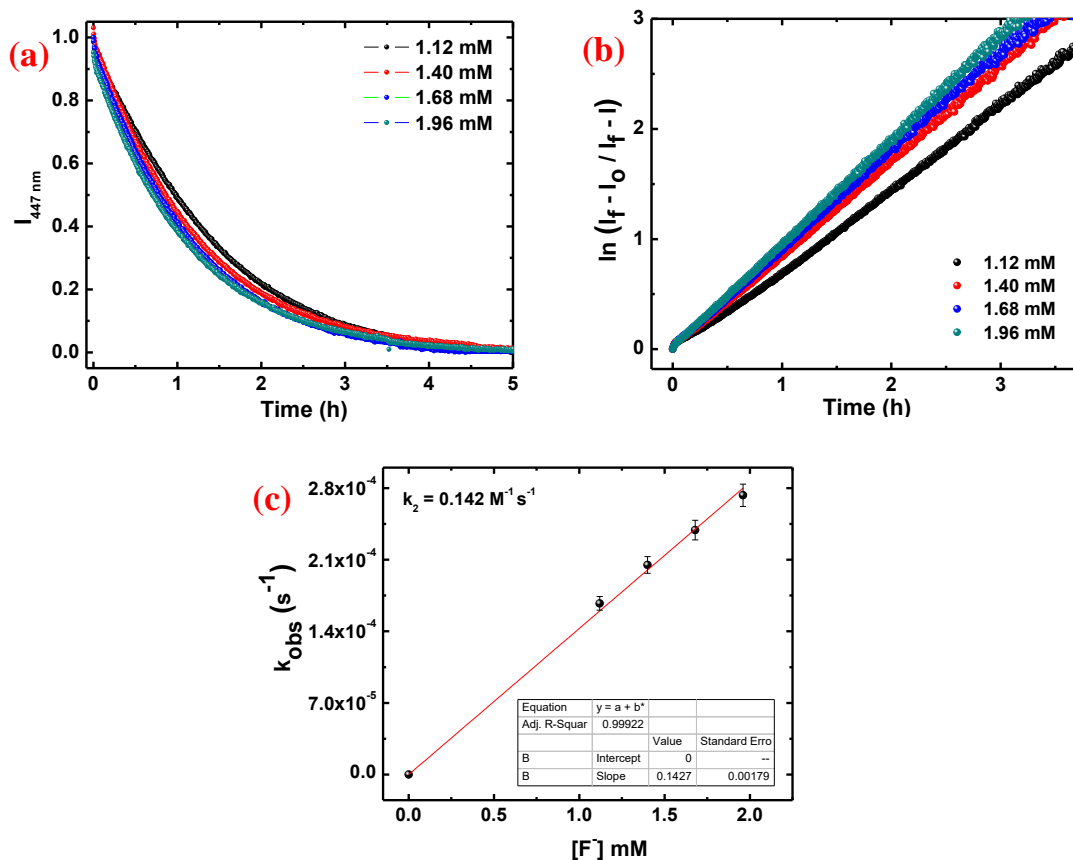

**Figure S-21.** a) Time course of desilylation reaction of ADDSi2 (14  $\mu\text{M}$ ) upon addition of different concentrations of NaF (1.12 mM – 1.96 mM) in ACN/Water (1:1) by following emission change at 447 nm. b) Guggenheim plot for pseudo first order kinetics of desilylation reaction of ADDSi2 in ACN/Water (1:1) on addition of different concentrations of NaF. c) Plot of fluoride concentration vs  $k_{\text{obs}}$  (ADDSi2 in ACN/Water (1:1)).

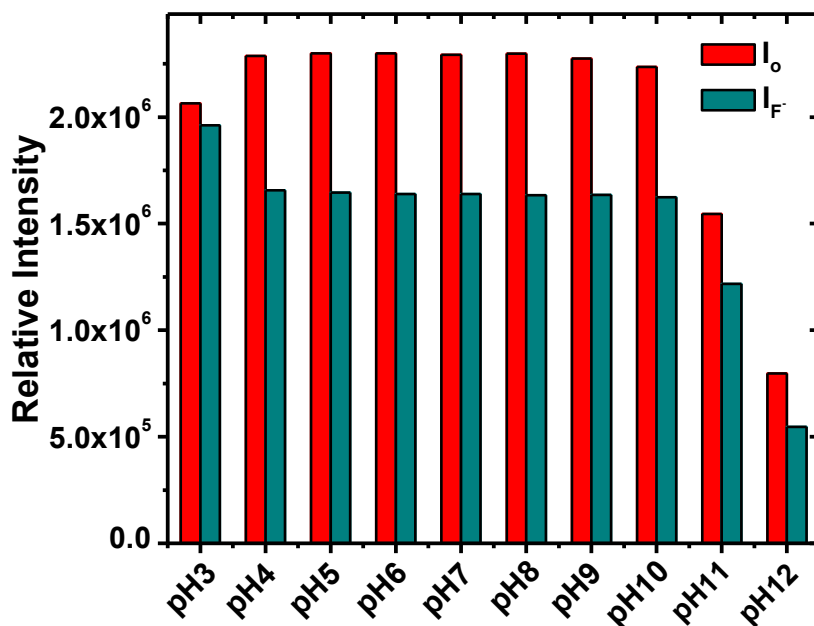

**Figure S-22.** Variation in fluorescence intensity of ADDSi2 (14  $\mu\text{M}$ ) before ( $I_0$ ) and after ( $I_F$ ) addition of fluoride ion (TBAF, 52.6  $\mu\text{M}$ ) in various pH buffer solutions - ACN/Water (1:1, 10mM buffer solutions pH 3 - 12)

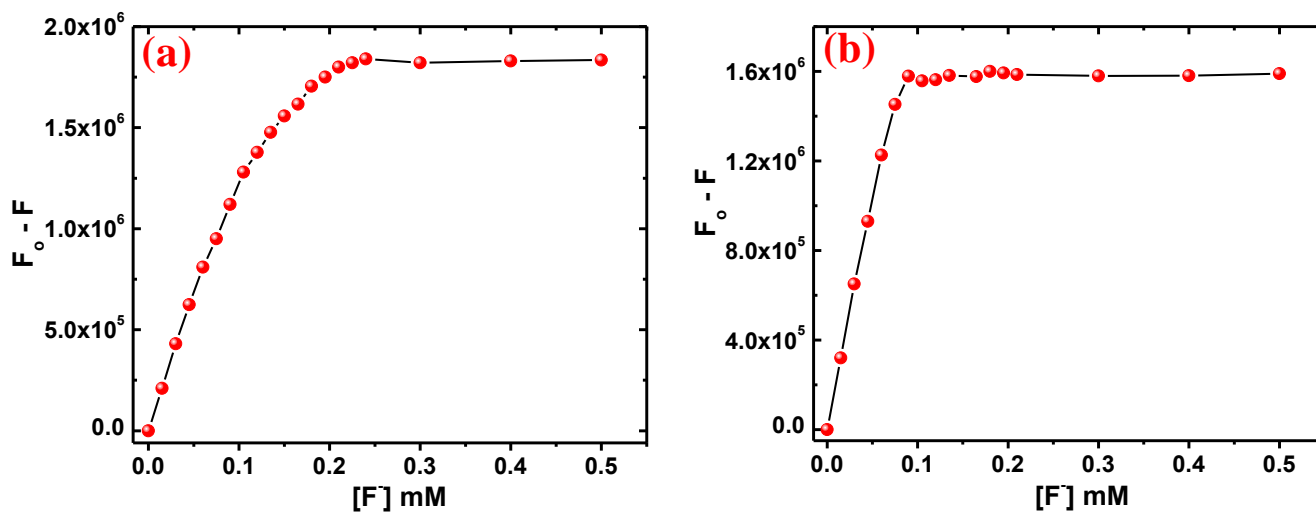

**Figure S-23. a)** Plot of change in emission intensity ( $F^0 - F$ ) of ADDSi1 in ACN/Water mixture (1:1) at 447 nm against concentration of fluoride ion **b)** Plot of change in emission intensity ( $F^0 - F$ ) of ADDSi2 in ACN/Water mixture (1:1) at 447 nm against concentration of fluoride ion.

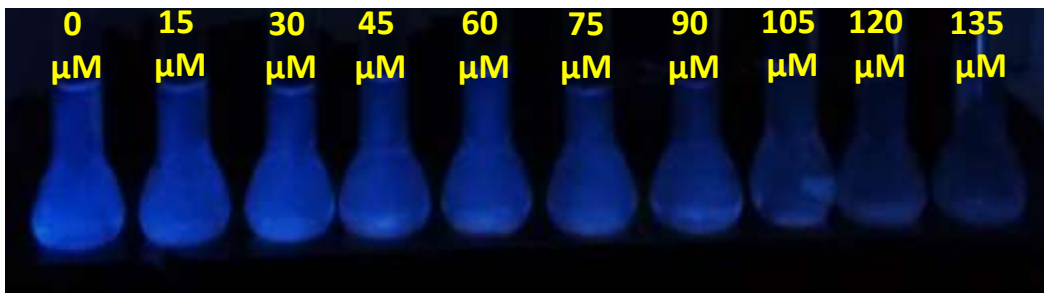

**Figure S-24.** Photograph shows the change in emission intensity upon addition different of fluoride ion (TBAF) under UV lamp (365 nm).

**Table S-1.** Photophysical data of ADDSi1 in various solvents.

| Solvent | Abs ( $\lambda_{\text{max}}$ ) | Emi ( $\lambda_{\text{max}}$ ) | $\Delta\nu(\text{cm}^{-1})$ | $\phi_f$ |
|---------|--------------------------------|--------------------------------|-----------------------------|----------|
| Toluene | 363                            | 430                            | 4292                        | 0.032    |
| ACN     | 371                            | 437                            | 4071                        | 0.40     |
| DMF     | 371                            | 438                            | 4123                        | 0.462    |
| MeOH    | 377                            | 453                            | 4450                        | 0.354    |
| Water   | 378                            | 451                            | 4282                        | 0.109    |

**Table S-2.** Photophysical data of ADDSi2 in various solvents.

| Solvent | Abs ( $\lambda_{\text{max}}$ ) | Emi ( $\lambda_{\text{max}}$ ) | $\Delta\nu(\text{cm}^{-1})$ | $\phi_f$ |
|---------|--------------------------------|--------------------------------|-----------------------------|----------|
| Toluene | 363                            | 427                            | 4129                        | 0.027    |
| ACN     | 371                            | 436                            | 4018                        | 0.385    |
| DMF     | 371                            | 438                            | 4123                        | 0.427    |
| MeOH    | 382                            | 453                            | 4103                        | 0.295    |
| Water   | 390                            | 463                            | 4043                        | 0.252    |



**Table S-3:** Fluorescence lifetime data of ADDSi1 on addition of F<sup>-</sup> ion (ACN) and monitored at 435 nm.

| Fluorescence lifetime data of ADDSi1 on addition of F <sup>-</sup> ion (ACN) and monitored at 436 nm |               |               |                    |                    |          |
|------------------------------------------------------------------------------------------------------|---------------|---------------|--------------------|--------------------|----------|
| [F <sup>-</sup> ] $\mu$ M                                                                            | $\tau_1$ (ns) | $\tau_2$ (ns) | A <sub>1</sub> (%) | A <sub>2</sub> (%) | $\chi^2$ |
| 0                                                                                                    | -             | 6.37          | -                  | 100                | 1.07     |
| 5                                                                                                    | 4.11          | 6.49          | 10.36              | 89.64              | 0.94     |
| 10                                                                                                   | 4.02          | 6.46          | 34.78              | 65.22              | 1.01     |
| 15                                                                                                   | 4.08          | 6.70          | 70.40              | 29.60              | 1.04     |
| 20                                                                                                   | 4.01          | 6.39          | 92.59              | 7.41               | 1.12     |
| 25                                                                                                   | 4.09          | -             | 100                | -                  | 1.14     |
| 50                                                                                                   | 4.05          | -             | 100                | -                  | 1.11     |
| 100                                                                                                  | 4.06          | -             | 100                | -                  | 1.01     |
| 200                                                                                                  | 4.05          | -             | 100                | -                  | 1.08     |
| 300                                                                                                  | 4.09          | -             | 100                | -                  | 1.16     |
| 400                                                                                                  | 4.03          | -             | 100                | -                  | 1.11     |
| 500                                                                                                  | 4.02          | -             | 100                | -                  | 1.07     |

**Table S-4:** Fluorescence lifetime data of ADDSi2 on addition of F<sup>-</sup> ion (ACN) and monitored at 435 nm.

| <b>Fluorescence lifetime data of ADDSi2 on addition of F<sup>-</sup> ion (ACN) and monitored at 436 nm</b> |                          |                          |                          |                          |                      |
|------------------------------------------------------------------------------------------------------------|--------------------------|--------------------------|--------------------------|--------------------------|----------------------|
| <b>[F<sup>-</sup>] μM</b>                                                                                  | <b>τ<sub>1</sub>(ns)</b> | <b>τ<sub>2</sub>(ns)</b> | <b>A<sub>1</sub> (%)</b> | <b>A<sub>2</sub> (%)</b> | <b>χ<sup>2</sup></b> |
| 0                                                                                                          | -                        | 5.87                     | -                        | 100                      | 1.10                 |
| 5                                                                                                          | 4.26                     | 5.91                     | 18.37                    | 81.63                    | 1.00                 |
| 10                                                                                                         | 4.17                     | 6.11                     | 42.06                    | 57.94                    | 1.05                 |
| 15                                                                                                         | 4.01                     | 6.09                     | 56.53                    | 43.47                    | 1.05                 |
| 20                                                                                                         | 4.01                     | 6.11                     | 75.30                    | 24.70                    | 1.17                 |
| 25                                                                                                         | 4.11                     | -                        | 100                      | -                        | 1.09                 |
| 50                                                                                                         | 4.08                     | -                        | 100                      | -                        | 1.14                 |
| 100                                                                                                        | 4.05                     | -                        | 100                      | -                        | 1.05                 |
| 200                                                                                                        | 4.09                     | -                        | 100                      | -                        | 1.04                 |
| 300                                                                                                        | 4.01                     | -                        | 100                      | -                        | 1.07                 |
| 400                                                                                                        | 4.06                     | -                        | 100                      | -                        | 1.16                 |
| 500                                                                                                        | 4.04                     | -                        | 100                      | -                        | 1.12                 |

**Table S-5:** Fluorescence lifetime data of ADDSi1 (ACN/water mixture) upon addition of F<sup>-</sup> ion.

| Fluorescence lifetime data of ADDSi1 upon addition of F <sup>-</sup> ion |                     |                     |                    |                    |                |
|--------------------------------------------------------------------------|---------------------|---------------------|--------------------|--------------------|----------------|
| [F <sup>-</sup> ] μM                                                     | τ <sub>1</sub> (ns) | τ <sub>2</sub> (ns) | A <sub>1</sub> (%) | A <sub>2</sub> (%) | χ <sup>2</sup> |
| 0                                                                        | -                   | 8.39                | -                  | 100                | 1.01           |
| 15                                                                       | 2.04                | 8.47                | 3.85               | 96.15              | 1.06           |
| 30                                                                       | 1.80                | 8.41                | 6.13               | 93.87              | 1.01           |
| 45                                                                       | 1.98                | 8.40                | 18.17              | 81.83              | 1.02           |
| 60                                                                       | 1.85                | 8.32                | 24.34              | 75.66              | 1.03           |
| 75                                                                       | 1.92                | 8.30                | 37.95              | 62.05              | 1.01           |
| 90                                                                       | 1.90                | 8.30                | 51.56              | 48.44              | 1.02           |
| 105                                                                      | 1.90                | 8.31                | 67.88              | 32.12              | 1.01           |
| 120                                                                      | 1.86                | 8.32                | 80.92              | 19.08              | 1.01           |
| 135                                                                      | 1.87                | 8.41                | 88.93              | 11.07              | 1.09           |
| 150                                                                      | 1.85                | 8.46                | 90.72              | 9.28               | 1.19           |
| 165                                                                      | 1.85                | 8.38                | 92.57              | 7.23               | 1.04           |
| 180                                                                      | 1.88                | 8.44                | 95.23              | 4.77               | 1.09           |
| 195                                                                      | 1.85                | 8.30                | 97.25              | 2.75               | 1.06           |

**Table S-6:** Fluorescence lifetime data of ADDSi2 (ACN/water mixture) upon addition of F<sup>-</sup> ion.

| Fluorescence lifetime data of ADDSi2 upon addition of F <sup>-</sup> ion |                     |                     |                    |                    |                |
|--------------------------------------------------------------------------|---------------------|---------------------|--------------------|--------------------|----------------|
| [F <sup>-</sup> ] μM                                                     | τ <sub>1</sub> (ns) | τ <sub>2</sub> (ns) | A <sub>1</sub> (%) | A <sub>2</sub> (%) | χ <sup>2</sup> |
| 0                                                                        |                     | 7.87                |                    | 100                | 1.20           |
| 15                                                                       | 1.88                | 7.84                | 12.48              | 87.52              | 1.05           |
| 30                                                                       | 1.91                | 7.84                | 39.27              | 60.73              | 1.00           |
| 45                                                                       | 1.88                | 7.84                | 64.52              | 35.48              | 1.12           |
| 60                                                                       | 1.85                | 7.84                | 78.74              | 21.26              | 1.11           |
| 75                                                                       | 1.89                | 7.84                | 90.28              | 9.72               | 1.11           |
| 90                                                                       | 1.82                | 7.84                | 92.37              | 7.63               | 1.06           |
| 105                                                                      | 1.88                | 7.84                | 94.24              | 5.76               | 1.15           |
| 120                                                                      | 1.90                | 7.84                | 95.89              | 4.11               | 1.21           |
| 135                                                                      | 1.88                | 7.84                | 95.92              | 4.08               | 1.01           |
| 150                                                                      | 1.87                | 7.84                | 95.93              | 4.07               | 1.08           |
| 165                                                                      | 1.88                | 7.84                | 96.12              | 3.88               | 1.02           |

**Table S-7.** Limit of Detection comparison from the literature.

| S.No. | Solvent Medium                    | LOD     | Reference      |
|-------|-----------------------------------|---------|----------------|
| 1.    | ACN                               | 50 nM   | 1              |
|       | H <sub>2</sub> O                  | 16 μM   |                |
| 2.    | ACN                               | 0.1 μM  | 2              |
|       | ACN - H <sub>2</sub> O (1:1, v:v) | 18 μM   |                |
| 3.    | ACN                               | 47 nM   | 3              |
|       | DMF - H <sub>2</sub> O (9:1, v:v) | 7 μM    |                |
| 4.    | ACN                               | 0.19 μM | Present System |
|       | ACN-H <sub>2</sub> O (1:1, v:v)   | 0.29 μM |                |

**Table S-8.** Kinetics data of ADDSi1 in ACN.

| [F <sup>-</sup> ] | k <sub>obs</sub> | k <sub>obs</sub> /[F <sup>-</sup> ] | k <sub>obs</sub> /[F <sup>-</sup> ] <sup>2</sup> |
|-------------------|------------------|-------------------------------------|--------------------------------------------------|
| 140 μM            | 0.0044           | 31.43                               | 224489                                           |
| 210 μM            | 0.0091           | 43.33                               | 206349                                           |
| 280 μM            | 0.0170           | 60.71                               | 216836                                           |
| 350 μM            | 0.0291           | 83.14                               | 237551                                           |
| 420 μM            | 0.0411           | 97.86                               | 232993                                           |

**Table S-9.** Kinetics data of ADDSi2 in ACN.

| [F <sup>-</sup> ] | k <sub>obs</sub> | k <sub>obs</sub> /[F <sup>-</sup> ] | k <sub>obs</sub> /[F <sup>-</sup> ] <sup>2</sup> |
|-------------------|------------------|-------------------------------------|--------------------------------------------------|
| 140 μM            | 0.022            | 157.14                              | 1122449                                          |
| 210 μM            | 0.045            | 216.67                              | 1031747                                          |
| 280 μM            | 0.083            | 295.00                              | 1053571                                          |
| 350 μM            | 0.141            | 402.57                              | 1150204                                          |
| 420 μM            | 0.203            | 483.33                              | 1150794                                          |

**Table S-10.** Kinetics data of ADDSi1 in ACN/Water (1:1).

| <b>[F<sup>-</sup>]</b>        | <b>k<sub>obs</sub></b> | <b>k<sub>obs</sub>/[F<sup>-</sup>]</b> |
|-------------------------------|------------------------|----------------------------------------|
| <b>1.12 mM</b>                | <b>0.000479</b>        | <b>0.427679</b>                        |
| <b>1.40 mM</b>                | <b>0.000578</b>        | <b>0.412857</b>                        |
| <b>1.68 mM</b>                | <b>0.000707</b>        | <b>0.420833</b>                        |
| <b>1.96 mM</b>                | <b>0.000790</b>        | <b>0.403061</b>                        |
| <b>k<sub>2</sub> = 0.4132</b> |                        |                                        |

**Table S-11.** Kinetics data of ADDSi2 in ACN/Water (1:1).

| <b>[F<sup>-</sup>]</b>         | <b>k<sub>obs</sub></b> | <b>k<sub>obs</sub>/[F<sup>-</sup>]</b> |
|--------------------------------|------------------------|----------------------------------------|
| <b>1.12 mM</b>                 | <b>0.000821</b>        | <b>0.733036</b>                        |
| <b>1.40 mM</b>                 | <b>0.001005</b>        | <b>0.717857</b>                        |
| <b>1.68 mM</b>                 | <b>0.001211</b>        | <b>0.720536</b>                        |
| <b>1.96 mM</b>                 | <b>0.001401</b>        | <b>0.714286</b>                        |
| <b>k<sub>2</sub> = 0.71252</b> |                        |                                        |

**Table S-12.** Kinetics data of ADDSi2 in ACN/Water (1:1) upon addition of NaF.

| <b>[F<sup>-</sup>]</b>        | <b>k<sub>obs</sub></b> | <b>k<sub>obs</sub>/[F<sup>-</sup>]</b> |
|-------------------------------|------------------------|----------------------------------------|
| <b>1.12 mM</b>                | <b>0.000167</b>        | <b>0.149375</b>                        |
| <b>1.40 mM</b>                | <b>0.000204</b>        | <b>0.146286</b>                        |
| <b>1.68 mM</b>                | <b>0.000238</b>        | <b>0.142202</b>                        |
| <b>1.96 mM</b>                | <b>0.000273</b>        | <b>0.139386</b>                        |
| <b>k<sub>2</sub> = 0.1428</b> |                        |                                        |

| Probe         | $k_3$ ( $M^{-2} s^{-1}$ ) in ACN | $k_2$ ( $M^{-1} s^{-1}$ ) in ACN/Water (1:1) |
|---------------|----------------------------------|----------------------------------------------|
| ADDSi1 (TBAF) | $2.22 \times 10^5$               | 0.411                                        |
| ADDSi2 (TBAF) | $1.10 \times 10^6$               | 0.720                                        |
| ADDSi2 (NaF)  | -                                | 0.143                                        |

### References

1. Highly Sensitive Fluorescence “Turn-On” Indicator for Fluoride Anion with Remarkable Selectivity in Organic and Aqueous Media. P. Sokkalingam, C.-H. Lee, *J. Org. Chem.* **2011**, 76, 3820.
2. A dual-channel probe for selective fluoride determination and application in live cell imaging. Z. Luo, B. Yang, C. Zhong, F. Tang, M. Yuan, Y. Xue, G. Yao, J. Zhang, Y. Zhang, *Dyes Pigm.* **2013**, 97, 52.
3. Rhodamine based dual probes for selective detection of mercury and fluoride ions in water using two mutually independent sensing pathways. N. Kumari, N. Dey, S. Bhattacharya, *Analyst*, **2014**, 139, 2370.
